# Supplementary material
Source: PubMed Central journal article supplement (PMC3397163)

## CONTENTS

|                                                              |      |
|--------------------------------------------------------------|------|
| nOe assignment of product <b>13</b> and the transition state | S-2  |
| Reaction Equations for Table 1                               | S-3  |
| Experimental Procedure                                       | S-4  |
| Crystal structures                                           | S-16 |
| $^1\text{H}$ and $^{13}\text{C}$ NMR Spectra                 | S-20 |

# $^1\text{H}$ nOe assignment of Product **13**

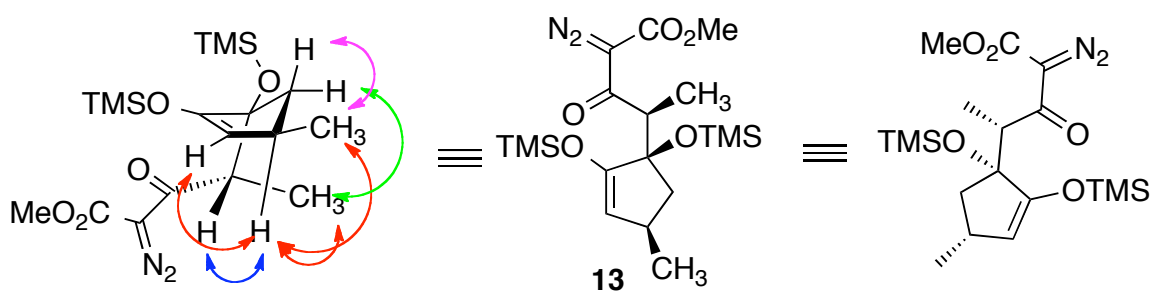

Proposed transition state of making product **13**.

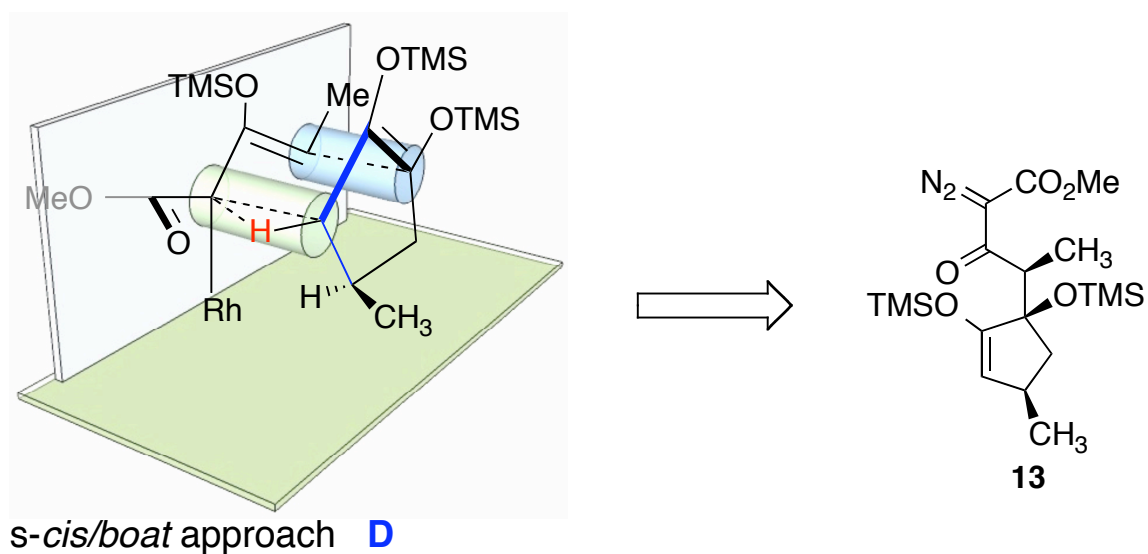

## Reaction Equations for Table 1

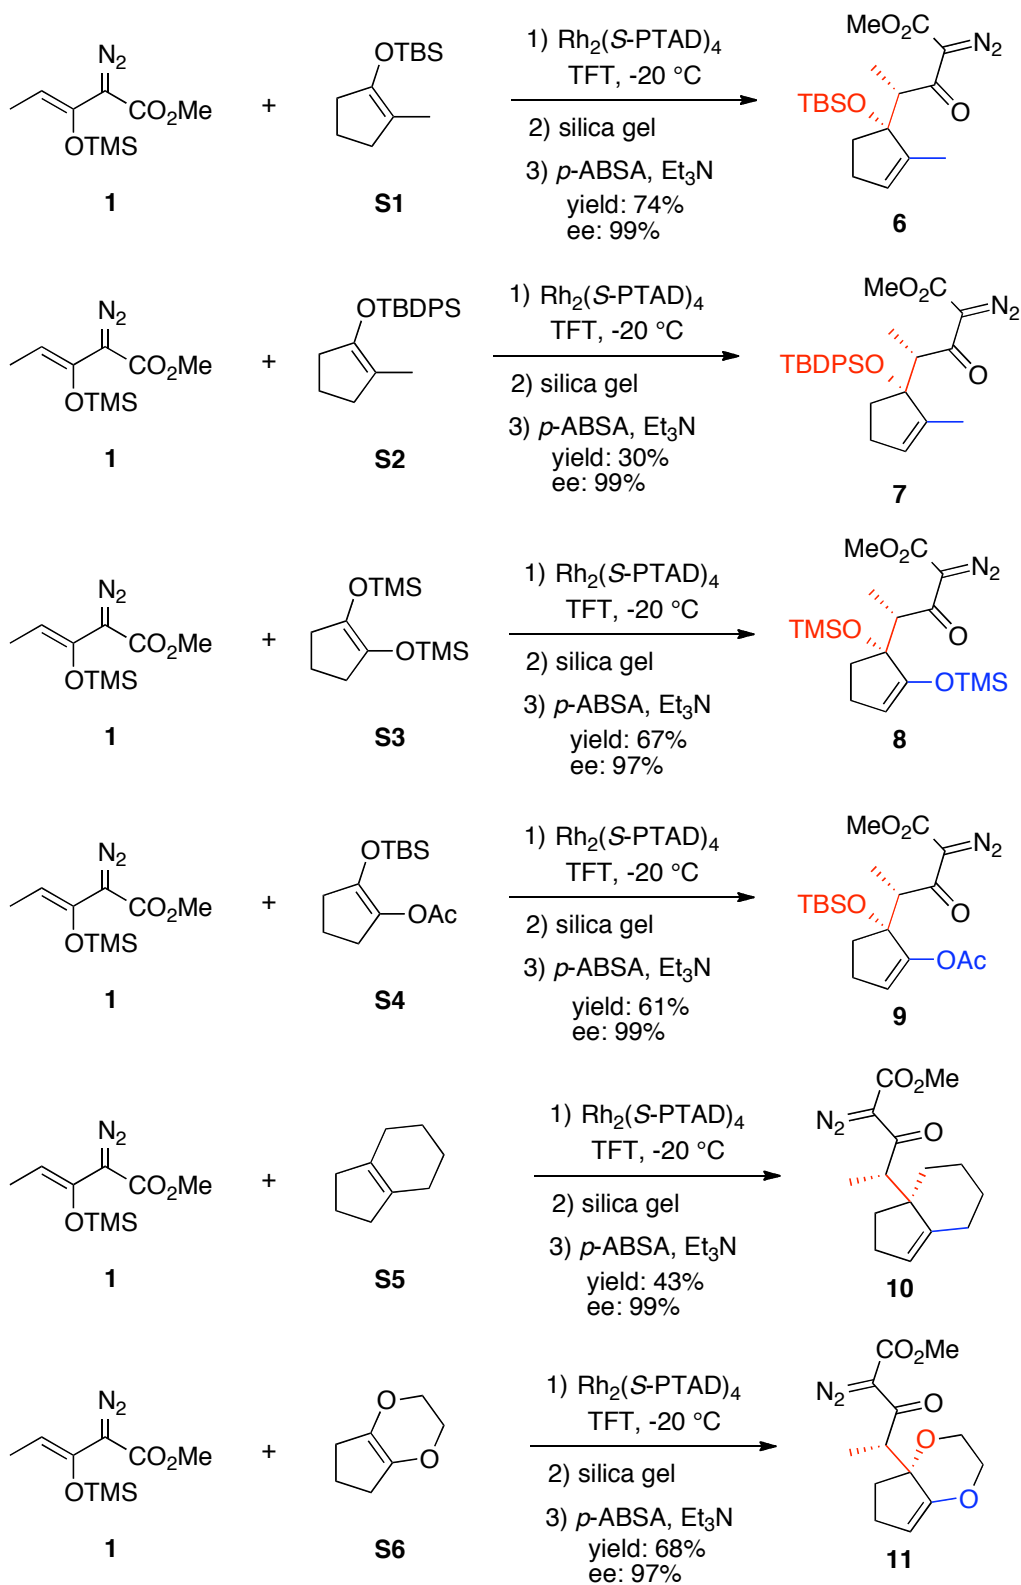

**General Methods:** All experiments were performed under anhydrous conditions in an atmosphere of argon except where stated, using flame-dried glassware. Toluene and methylenechloride were dried by a solvent purification system (passed through activated alumina columns). Unless otherwise noted, all other reagents were obtained from commercial sources and used as received. <sup>1</sup>H Nuclear Magnetic Resonance (NMR) spectra were recorded at 400 or 600 MHz. Data are presented as follows: chemical shift (in ppm on the  $\delta$  scale relative to  $\delta$ H 7.26 for the residual protons in CDCl<sub>3</sub> and  $\delta$ H 7.15 for the residual protons in C<sub>6</sub>D<sub>6</sub>), multiplicity (s = singlet, d = doublet, t = triplet, q = quartet, m = multiplet, br = broad), coupling constant (*J*/Hz), integration. Coupling constants were taken directly from the spectra and are uncorrected. <sup>13</sup>C NMR spectra were recorded at 100 or 150 MHz, and all chemical shift values are reported in ppm on the  $\delta$  scale, with an internal reference of  $\delta$ C 77.0 for CDCl<sub>3</sub>. Mass spectral determinations were carried out by using APCI as ionization source. Melting points are uncorrected. Infrared spectral data are reported in units of cm<sup>-1</sup>. Analytical TLC was performed on silica gel plates using UV light or potassium permanganate stain if stated. Flash column chromatography was performed on silica gel 60A (230-400 mesh). Optical rotations were measured on Jasco polarimeters. Analytical enantioselective chromatographies were measured on Varian Prostar instrument and used isopropanol/hexane as gradient.

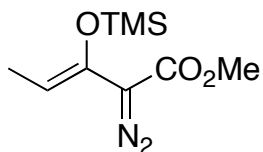

**(Z)-methyl 2-diazo-3-((trimethylsilyl)oxy)pent-3-enoate (1):**

Triethylamine (2.0 mL, 14.3 mmol, 1.4 equiv) was added to a stirring solution of methyl 2-diazo-3-oxopentanoate (1.58 g, 10.1 mmol, 1.0 equiv) in dichloromethane (26 mL) at 0 °C under an inert argon atmosphere. Trimethylsilyl trifluoromethanesulfonate (2.3 mL, 12.2 mmol, 1.2 equiv) was added over 5 min and the mixture was further stirred for 30 min at 0 °C. The reaction mixture was diluted with pentane (100 mL), and the organic phase was subsequently washed with dilute aqueous sodium bicarbonate (100 mL) and brine (100 mL). The organic layer was dried (MgSO<sub>4</sub>), and the solvent was removed under reduced pressure to yield the title product as a reddish oil (essentially quantitative yield), which was used without further purification.

<sup>1</sup>H NMR (400 MHz, C<sub>6</sub>D<sub>6</sub>): δ 5.71 (q, *J* = 7.0 Hz, 1H), 3.29 (s, 3H), 1.63 (d, *J* = 6.7 Hz, 3H), 0.10 (s, 9H); <sup>13</sup>C NMR (150 MHz, C<sub>6</sub>D<sub>6</sub>): δ 165.0, 133.5, 106.7, 51.7, 12.4, 0.4; IR (neat): 2084, 1709, 1436, 1341, 1253, 1098, 1059, 842, 754 cm<sup>-1</sup>.

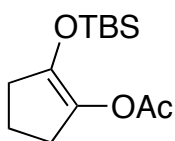

**2-((*tert*-butyldimethylsilyloxy)cyclopent-1-en-1-yl acetate (S4):**

To an oven-dried flask containing 2-oxocyclopentyl acetate (2.13 g, 15.0 mmol, 1.0 equiv) and Et<sub>3</sub>N (4.2 mL, 30 mmol, 2.0 equiv) in 20 mL DCM was added slowly with TBSOTf (4.5 mL, 19.5 mmol, 1.3 equiv) at 0 °C. The mixture was stirred for 2 h and was quenched by saturated NaHCO<sub>3</sub> solution and extracted by pentane (2 X 50 mL). The organic layers were combined, dried (MgSO<sub>4</sub>) and concentrated under reduced pressure. The residue was purified by flash chromatography (20/1 pentane/ether, R<sub>f</sub>: 0.41) on silica gel to provide product as a colorless oil (1.98 g, 52% yield).

$^1\text{H}$  NMR (400 MHz,  $\text{C}_6\text{D}_6$ ):  $\delta$  2.46-2.51 (m, 2H), 2.08-2.14 (m, 2H), 1.75 (s, 3H), 1.56-1.64 (m, 2H), 0.98 (s, 9H), 0.12 (s, 6H);  $^{13}\text{C}$  NMR (100 MHz,  $\text{C}_6\text{D}_6$ ):  $\delta$  168.1, 138.8, 128.8, 30.9, 28.3, 26.1, 20.7, 18.6, 17.7, -3.8; IR (neat): 2930, 2857, 1757, 1709, 1340, 1204, 1070, 892, 837, 780  $\text{cm}^{-1}$ ; HRMS (APCI) calc. for  $\text{C}_{13}\text{H}_{25}\text{O}_3\text{Si}$  ( $\text{M}+\text{H}$ ) $^+$  257.1568 found 257.1566.

### General procedure for making $\beta$ -keto diazoacetates:

To an oven-dried 25 mL flask containing  $\text{Rh}_2(\text{S-PTAD})_4$  (16.5 mg, 0.01 equiv) and substrate (1.0 mmol, 1.0 equiv) in 6 mL dried trifluorotoluene under argon atmosphere was added a solution of (*Z*)-methyl 2-diazo-3-((trimethylsilyl)oxy)pent-3-enoate (**1**) (365 mg, 1.6 mmol, 1.6 equiv) in 6 mL dried trifluorotoluene by syringe pump over 3 h at -20  $^\circ\text{C}$ . The solution was warmed up to room temperature over 2 h. The mixture was concentrated under reduced pressure and then stirred with 5 g silica gel in 15 mL hexane for 30 mins. The mixture was filtrated and washed with several portions of  $\text{Et}_2\text{O}$ . The organic layer was concentrated under vacuum and the residue was purified by flash chromatography on silica gel to provide a colorless oil, which was dissolved in 5 mL dried  $\text{CH}_3\text{CN}$  containing *p*-ABSA (240 mg, 1.0 mmol, 1.0 equiv.),  $\text{Et}_3\text{N}$  (0.30 ml, 2.0 mmol, 2.0 equiv.) The mixture was stirred for additional 3h and then concentrated under reduced pressure. The residue was purified by flash chromatography on silica gel to provide  $\beta$ -keto diazoacetates.

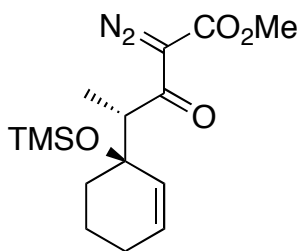

### (*S*)-methyl 2-diazo-3-oxo-4-((*R*)-1-((trimethylsilyl)oxy)cyclohex-2-en-1-yl)pentanoate (**3a**):

Derived from (cyclohex-1-en-1-yloxy)trimethylsilane (**2a**) (170.3 mg, 1.0 mmol, 1.0 equiv) and (*Z*)-methyl 2-diazo-3-((trimethylsilyl)oxy)pent-3-enoate (**1**) (365 mg, 1.6 mmol, 1.6 equiv), and purified by flash chromatography (20/1 pentane/ $\text{Et}_2\text{O}$ ,  $R_f$ : 0.25) on

silica gel to provide the corresponding  $\beta$ -keto ester. The diazo transferred residue was purified by flash chromatography (20/1 pentane/Et<sub>2</sub>O, R<sub>f</sub>: 0.32) on silica gel to provide **3a** as a yellow oil (240 mg, 74% yield).

<sup>1</sup>H NMR (400 MHz, CDCl<sub>3</sub>):  $\delta$  5.82-5.84 (m, 2H), 3.96-4.06 (br, 1H), 3.82 (s, 3H), 1.53-2.02 (m, 6H), 1.05 (d, *J* = 6.7 Hz, 3H), 0.03 (s, 9H); <sup>13</sup>C NMR (150 MHz, CDCl<sub>3</sub>):  $\delta$  194.9, 161.8, 131.9, 129.6, 74.8, 52.0, 50.1, 33.8, 25.0, 18.1, 12.2, 2.3; IR (neat): 2954, 2135, 1722, 1652, 1299, 1200, 1127, 1029, 998, 836 cm<sup>-1</sup>; HRMS (ESI) calc. for C<sub>15</sub>H<sub>24</sub>O<sub>4</sub>N<sub>2</sub>NaSi (M+Na)<sup>+</sup> 347.1398 found 347.1340; [ $\alpha$ ]<sub>D</sub><sup>25</sup> 131.9 (*c* = 1.34, CHCl<sub>3</sub>). HPLC: (OD-H, 0.2% isopropanol in hexane, 0.7 mL/min) retention times of 14.4 min (minor) and 16.7 min (major), 89% ee.

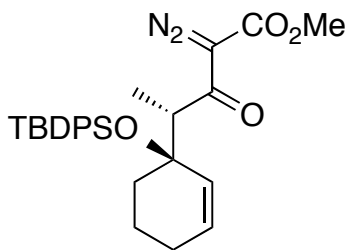

**(S)-methyl 4-((R)-1-((tert-butylidiphenylsilyl)oxy)cyclohex-2-en-1-yl)-2-diazo-3-oxopentanoate (3b):**

Derived from *tert*-butyl(cyclohex-1-en-1-yloxy)diphenylsilane (**2b**) (336.5 mg, 1.0 mmol, 1.0 equiv) and (*Z*)-methyl 2-diazo-3-((trimethylsilyl)oxy)pent-3-enoate (**1**) (365 mg, 1.6 mmol, 1.6 equiv), and purified by flash chromatography (10/1 pentane/Et<sub>2</sub>O, R<sub>f</sub>: 0.42) on silica gel to provide the corresponding  $\beta$ -keto ester. The diazo transferred residue was purified by flash chromatography (10/1 pentane/Et<sub>2</sub>O, R<sub>f</sub>: 0.52) on silica gel to provide **3b** as a yellow powder (230.1 mg, 47% yield).

<sup>1</sup>H NMR (400 MHz, CDCl<sub>3</sub>):  $\delta$  7.68-7.73 (m, 4H), 7.31-7.42 (m, 6H), 5.58-5.66 (m, 1H), 5.35-5.43 (m, 1H), 4.22-4.34 (m, 1H), 3.81 (s, 3H), 1.95-2.07 (m, 1H), 1.74-1.83 (m, 1H), 1.54-1.67 (m, 1H), 1.21-1.38 (m, 3H), 1.25 (d, *J* = 7.6 Hz, 3H), 1.03 (s, 9H); <sup>13</sup>C NMR (150 MHz, CDCl<sub>3</sub>):  $\delta$  194.6, 161.6, 136.5, 136.4, 135.6, 135.5, 131.2, 130.3, 129.1, 127.0, 76.0, 52.0, 51.0 33.6, 27.1, 24.4, 19.5, 18.9, 12.6; IR (neat): 2933, 2136, 1720, 1654, 1427, 1300, 1108, 994, 739, 700 cm<sup>-1</sup>; HRMS (APCI) calc. for C<sub>28</sub>H<sub>35</sub>O<sub>4</sub>Si (M-

$\text{N}_2+\text{H}^+$  463.2299 found 463.2296;  $[\alpha]_{\text{D}}^{25}$  107.9 ( $c = 1.28$ ,  $\text{CHCl}_3$ ). HPLC: (AD-H, 100% hexane, 1.0 mL/min) retention times of 12.3 min (minor) and 12.8 min (major), 97% ee.

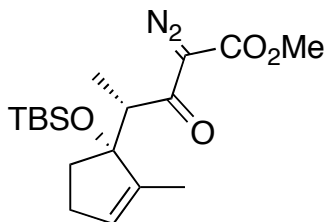

**(S)-methyl 4-((R)-1-((tert-butyldimethylsilyl)oxy)-2-methylcyclopent-2-en-1-yl)-2-diazo-3-oxopentanoate (6):**

Derived from *tert*-butyldimethyl((2-methylcyclopent-1-en-1-yl)oxy)silane (**S1**) (212.4 mg, 1.0 mmol, 1.0 equiv) and (*Z*)-methyl 2-diazo-3-((trimethylsilyl)oxy)pent-3-enoate (**1**) (365 mg, 1.6 mmol, 1.6 equiv), and purified by flash chromatography (10/1 pentane/ $\text{Et}_2\text{O}$ ,  $R_f$ : 0.44) on silica gel to provide the corresponding  $\beta$ -keto ester. The diazo transferred residue was purified by flash chromatography (20/1 pentane/ $\text{Et}_2\text{O}$ ,  $R_f$ : 0.39) on silica gel to provide **6** as a yellow oil (226 mg, 62% yield).

$^1\text{H}$  NMR (400 MHz,  $\text{CDCl}_3$ ):  $\delta$  5.53 (d,  $J = 1.2$  Hz, 1H), 4.27 (br, 1H), 3.81 (s, 3H), 2.76 (ddd,  $J = 15.3, 9.5, 4.3$  Hz, 1H), 2.28-2.38 (m, 1H), 2.11-2.20 (m, 1H), 1.76 (ddd,  $J = 14.9, 9.2, 4.6$  Hz, 1H), 1.70 (q,  $J = 2.0$  Hz, 3H), 0.87 (d,  $J = 7.6$  Hz, 3H), 0.77 (s, 9H), -0.02 (s, 3H), -0.04 (s, 3H);  $^{13}\text{C}$  NMR (150 MHz,  $\text{CDCl}_3$ ):  $\delta$  196.4, 161.9, 142.0, 129.5, 92.4, 52.0, 45.5, 31.8, 30.0, 25.6, 18.2, 12.3, 11.7, -3.3, -3.7; IR (neat): 2954, 2929, 2856, 2123, 1724, 1655, 1436, 1301, 1211, 1195, 1127, 1066, 773  $\text{cm}^{-1}$ ; HRMS (ESI) calc. for  $\text{C}_{18}\text{H}_{30}\text{O}_4\text{N}_2\text{NaSi}$  ( $\text{M}+\text{Na}$ ) $^+$  389.1867 found 389.1866;  $[\alpha]_{\text{D}}^{25}$  -1.5 ( $c = 1.39$ ,  $\text{CHCl}_3$ ). HPLC: (AD-H, 0.5% isopropanol in hexane, 0.7 mL/min) retention times of 6.8 min (major) and 7.6 min (minor), 99% ee.



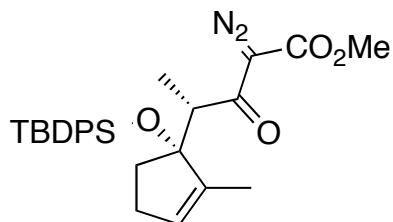

**(S)-methyl 4-((R)-1-((*tert*-butyldiphenylsilyl)oxy)-2-methylcyclopent-2-en-1-yl)-2-diazo-3-oxopentanoate (7):**

Derived from *tert*-butyl((2-methylcyclopent-1-en-1-yl)oxy)diphenylsilane (**S2**) (336.5 mg, 1.0 mmol, 1.0 equiv) and (*Z*)-methyl 2-diazo-3-((trimethylsilyl)oxy)pent-3-enoate (**1**) (365 mg, 1.6 mmol, 1.6 equiv), and purified by flash chromatography (20/1 pentane/Et<sub>2</sub>O, R<sub>f</sub>: 0.27) on silica gel to provide the corresponding  $\beta$ -keto ester. The diazo transferred residue was purified by flash chromatography (10/1 pentane/Et<sub>2</sub>O, R<sub>f</sub>: 0.42) on silica gel to provide as a yellow powder (145 mg, 30% yield).

<sup>1</sup>H NMR (600 MHz, CDCl<sub>3</sub>):  $\delta$  7.59-7.63 (m, 2H), 7.52-7.55 (m, 2H), 7.34-7.39 (m, 2H), 7.29-7.33 (m, 2H), 7.24-7.28 (m, 2H), 4.87 (d,  $J = 1.4$  Hz, 1H), 4.52 (br, 1H), 3.86 (s, 3H), 2.77-2.82 (m, 1H), 1.81-1.88 (m, 1H), 1.73-1.80 (m, 1H), 1.60 (d,  $J = 1.4$  Hz, 3H), 1.38-1.45 (m, 1H), 0.96 (s, 9H), 0.87 (d,  $J = 6.2$  Hz, 3H); <sup>13</sup>C NMR (150 MHz, CDCl<sub>3</sub>):  $\delta$  196.8, 162.0, 140.1, 136.1, 136.0, 135.1, 134.6, 130.2, 129.3, 129.2, 127.1, 126.9, 94.1, 52.0, 45.2, 32.3, 30.0, 27.1, 19.2, 12.2, 11.8; IR (neat): 2930, 2134, 1720, 1647, 1430, 1304, 1189, 1106, 1058, 1011, 736, 700 cm<sup>-1</sup>; HRMS (ESI) calc. for C<sub>28</sub>H<sub>34</sub>O<sub>4</sub>N<sub>2</sub>NaSi (M+Na)<sup>+</sup> 513.2180 found 513.2178; [ $\alpha$ ]<sub>D</sub><sup>25</sup> -55.3 ( $c = 1.27$ , CHCl<sub>3</sub>); HPLC: (AD-H, 0.5% isopropanol in hexane, 0.7 mL/min) retention times of 9.2 min (minor) and 11.8 min (major), 99% ee.

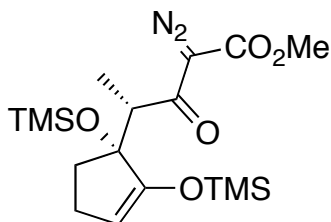

**(S)-methyl 4-((R)-1,2-bis(trimethylsilyloxy)cyclopent-2-en-1-yl)-2-diazo-3-oxopentanoate (8):**

Derived from 1,2-bis(trimethylsilyloxy)cyclopent-1-ene (**S3**) (336.5 mg, 1.0 mmol, 1.0 equiv) and (*Z*)-methyl 2-diazo-3-((trimethylsilyloxy)oxy)pent-3-enoate (**1**) (365 mg, 1.6 mmol, 1.6 equiv), and purified by flash chromatography (20/1 pentane/Et<sub>2</sub>O, R<sub>f</sub>: 0.18) on silica gel to provide the corresponding  $\beta$ -keto ester. The diazo transferred residue was purified by flash chromatography (20/1 pentane/Et<sub>2</sub>O, R<sub>f</sub>: 0.24) on silica gel to provide as a yellow oil (267 mg, 67% yield).

<sup>1</sup>H NMR (400 MHz, CDCl<sub>3</sub>):  $\delta$  4.74 (t, *J* = 4.2 Hz, 1H), 3.93 (br, 1H), 3.82 (s, 3H), 2.54 (ddd, *J* = 13.7, 9.5, 4.3 Hz, 1H), 2.19-2.31 (m, 1H), 2.04-2.12 (m, 1H), 1.59-1.66 (m, 1H), 0.90 (d, *J* = 7.0 Hz, 3H), 0.25 (s, 9H), 0.02 (s, 9H); <sup>13</sup>C NMR (150 MHz, CDCl<sub>3</sub>):  $\delta$  195.2, 162.1, 153.4, 104.5, 88.2, 52.1, 46.0, 30.5, 25.2, 12.0, 1.4, -0.2; HRMS (ESI) calc. for C<sub>17</sub>H<sub>30</sub>O<sub>5</sub>N<sub>2</sub>NaSi<sub>2</sub> (M+Na)<sup>+</sup> 421.1586 found 421.1586; [ $\alpha$ ]<sub>D</sub><sup>25</sup> 26.1 (*c* = 2.06, CHCl<sub>3</sub>). HPLC: (OD-H, 0.1% isopropanol in hexane, 0.4 mL/min) retention times of 21.9 min (minor) and 25.6 min (major), 97% ee.

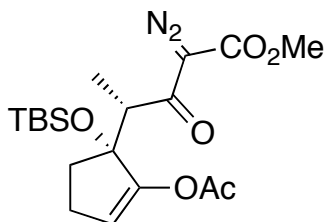

**(S)-methyl 4-((R)-2-acetoxy-1-((tert-butyldimethylsilyloxy)cyclopent-2-en-1-yl)-2-diazo-3-oxopentanoate (9):**

Derived from 2-((tert-butyldimethylsilyloxy)cyclopent-1-en-1-yl) acetate (**S4**) (256.4 mg, 1.0 mmol, 1.0 equiv) and (*Z*)-methyl 2-diazo-3-((trimethylsilyloxy)oxy)pent-3-enoate (**1**) (365 mg, 1.6 mmol, 1.6 equiv), and purified by flash chromatography (85/15 pentane/Et<sub>2</sub>O, R<sub>f</sub>: 0.29) on silica gel to provide the corresponding  $\beta$ -keto ester. The diazo

transferred residue was purified by flash chromatography (20/1 pentane/Et<sub>2</sub>O, R<sub>f</sub>: 0.24) on silica gel to provide **9** as a yellow oil (250 mg, 61% yield).

<sup>1</sup>H NMR (400 MHz, CDCl<sub>3</sub>): δ 5.89 (t, *J* = 2.4 Hz, 1H), 4.26 (br, 1H), 3.80 (s, 3H), 2.76 (ddd, *J* = 15.0, 9.2, 3.8 Hz, 1H), 2.36-2.46 (m, 1H), 2.22-2.30 (m, 1H), 2.22 (s, 3H), 1.74 (ddd, *J* = 15.0, 9.4, 4.2 Hz, 1H), 0.95 (d, *J* = 7.6 Hz, 3H), 0.77 (s, 9H), -0.01 (s, 6H); <sup>13</sup>C NMR (150 MHz, CDCl<sub>3</sub>): δ 195.4, 168.2, 161.6, 148.5, 116.9, 88.0, 52.0, 45.5, 30.4, 26.5, 25.4, 21.4, 18.1, 12.5, -3.6, -3.8; IR (neat): 2929, 2857, 2137, 1768, 1724, 1653, 1303, 1193, 1072, 835, 775 cm<sup>-1</sup>; HRMS (ESI) calc. for C<sub>19</sub>H<sub>30</sub>O<sub>6</sub>N<sub>2</sub>NaSi (M+Na)<sup>+</sup> 433.1765 found 433.1766; [α]<sub>D</sub><sup>25</sup> 11.2 (*c* = 1.18, CHCl<sub>3</sub>). HPLC: (OD-H, 0.5% isopropanol in hexane, 0.7 mL/min) retention times of 8.8 min (minor) and 10.4 min (major), 99% ee.

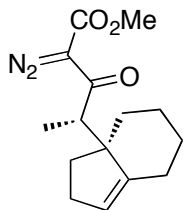

**(S)-methyl 2-diazo-4-((S)-2,4,5,6,7,7a-hexahydro-1H-inden-7a-yl)-3-oxopentanoate (10):**

Derived from 2,3,4,5,6,7-hexahydro-1H-indene (**S5**) (122.2 mg, 1.0 mmol, 1.0 equiv) and (*Z*)-methyl 2-diazo-3-((trimethylsilyl)oxy)pent-3-enoate (**1**) (365 mg, 1.6 mmol, 1.6 equiv), and purified by flash chromatography (20/1 pentane/Et<sub>2</sub>O, R<sub>f</sub>: 0.30) on silica gel to provide the corresponding β-keto ester. The diazo transferred residue was purified by flash chromatography (20/1 pentane/Et<sub>2</sub>O, R<sub>f</sub>: 0.41) on silica gel to provide **10** as a yellow oil (119 mg, 43% yield).

<sup>1</sup>H NMR (600 MHz, CDCl<sub>3</sub>): δ 5.34 (d, *J* = 1.9 Hz, 1H), 4.21 (q, *J* = 7.1 Hz, 1H), 3.84 (s, 3H), 2.73 (ddd, *J* = 14.3, 8.6, 3.8 Hz, 1H), 2.29-2.32 (m, 1H), 2.17-2.28 (m, 2H), 1.98-2.03 (m, 1H), 1.87 (d, *J* = 13.8 Hz, 1H), 1.77-1.82 (m, 1H), 1.42-1.61 (m, 3H), 1.18-1.27 (m, 2H), 1.01 (d, *J* = 7.1 Hz, 3H); <sup>13</sup>C NMR (150 MHz, CDCl<sub>3</sub>): δ 197.1, 161.6, 146.6, 122.6, 53.1, 52.1, 41.8, 39.9, 33.3, 31.4, 28.1, 26.2, 22.4, 12.8; IR (neat): 2930, 2852, 2135, 1715, 1655, 1436, 1297, 1195, 1128, 988, 731 cm<sup>-1</sup>; HRMS (ESI) calc. for

$C_{15}H_{20}O_3N_2Na$  ( $M+Na$ )<sup>+</sup> 299.1366 found 299.1367;  $[\alpha]_D^{25}$  -31.6 ( $c = 1.85$ ,  $CHCl_3$ ). HPLC: (OD-H, 0.5% isopropanol in hexane, 0.7 mL/min) retention times of 9.1 min (minor) and 10.4 min (major), 99% ee.

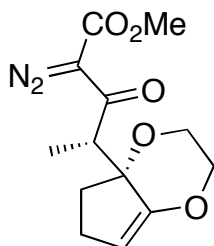

**(S)-methyl 2-diazo-3-oxo-4-((R)-3,4a,5,6-tetrahydro-2H-cyclopenta[b][1,4]dioxin-4a-yl)pentanoate (11):**

Derived from 3,5,6,7-tetrahydro-2H-cyclopenta[b][1,4]dioxine (**S6**)<sup>1</sup> (126.1 mg, 1.0 mmol, 1.0 equiv) and (Z)-methyl 2-diazo-3-((trimethylsilyl)oxy)pent-3-enoate (**1**) (365 mg, 1.6 mmol, 1.6 equiv), and purified by flash chromatography (7/3 pentane/Et<sub>2</sub>O, R<sub>f</sub>: 0.26) on silica gel to provide the corresponding  $\beta$ -keto ester. The diazo transferred residue was purified by flash chromatography (7/3 pentane/Et<sub>2</sub>O, R<sub>f</sub>: 0.29) on silica gel to provide **11** as a yellow oil (190 mg, 68% yield).

<sup>1</sup>H NMR (400 MHz, C<sub>6</sub>D<sub>6</sub>):  $\delta$  5.10 (t,  $J = 2.4$  Hz, 1H), 4.80 (q,  $J = 7.1$  Hz, 1H), 4.23-4.28 (m, 1H), 3.72-3.77 (m, 1H), 3.56-3.60 (m, 2H), 3.18 (s, 3H), 3.11-3.17 (m, 1H), 1.93-2.05 (m, 3H), 1.20 (d,  $J = 7.0$  Hz, 3H); <sup>13</sup>C NMR (150 MHz, C<sub>6</sub>D<sub>6</sub>):  $\delta$  194.7, 162.1, 154.7, 107.3, 87.2, 68.7, 61.9, 51.7, 45.3, 34.5, 26.0, 12.6; IR (neat): 2139, 1716, 1648, 1436, 1302, 1199, 1127, 1001, 899 cm<sup>-1</sup>; HRMS (APCI) calc. for C<sub>13</sub>H<sub>17</sub>O<sub>5</sub>N<sub>2</sub> ( $M+H$ )<sup>+</sup> 281.1132 found 281.1133;  $[\alpha]_D^{25}$  -17.0 ( $c = 1.76$ , CH<sub>3</sub>CN). HPLC: (AD-H, 2% isopropanol in hexane, 0.7 mL/min) retention times of 15.3 min (minor) and 18.8 min (major), 97% ee.

<sup>1</sup> Fjeldskaar, I. R.; Rongved, P.; Skattebøl, L. *Acta Chem. Scand.* **1987**, 477.

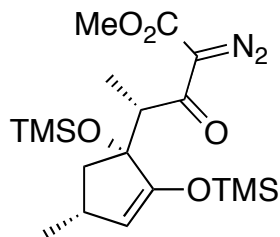

**(S)-methyl 2-diazo-4-((1R,4R)-4-methyl-1,2-bis(trimethylsilyloxy)cyclopent-2-en-1-yl)-3-oxopentanoate (13):**

Derived from ((4-methylcyclopent-1-ene-1,2-diyl)bis(oxy))bis(trimethylsilane) (**12**) (258.5 mg, 1.0 mmol, 1.0 equiv) and (*Z*)-methyl 2-diazo-3-((trimethylsilyloxy)pent-3-enoate (**1**) (365 mg, 1.6 mmol, 1.6 equiv), and purified by flash chromatography (10/1 pentane/Et<sub>2</sub>O, R<sub>f</sub>: 0.36) on silica gel to provide the corresponding  $\beta$ -keto ester. The diazo transferred residue was purified by flash chromatography (10/1 pentane/Et<sub>2</sub>O, R<sub>f</sub>: 0.40) on silica gel to provide **13** as a yellow oil (166 mg, 40% yield).

<sup>1</sup>H NMR (400 MHz, C<sub>6</sub>D<sub>6</sub>):  $\delta$  4.60 (d,  $J$  = 2.4 Hz, 1H), 4.47 (q,  $J$  = 7.1 Hz, 1H), 3.29 (s, 3H), 3.23-3.34 (m, 1H), 2.28-2.38 (m, 1H), 1.45 (dd,  $J$  = 14.3, 8.2 Hz, 1H), 1.10 (d,  $J$  = 7.0 Hz, 3H), 0.99 (d,  $J$  = 6.7 Hz, 3H), 0.22 (s, 9H), 0.21 (s, 9H); <sup>13</sup>C NMR (150 MHz, CDCl<sub>3</sub>):  $\delta$  195.3, 162.1, 154.0, 111.0, 89.3, 76.4, 51.7, 42.1, 33.7, 23.1, 12.4, 2.6, 0.2; IR (neat): 2956, 2120, 1728, 1645, 1301, 1248, 1209, 1128, 1044, 837, 751 cm<sup>-1</sup>; HRMS (ESI) calc. for C<sub>18</sub>H<sub>32</sub>O<sub>5</sub>N<sub>2</sub>NaSi<sub>2</sub> (M+Na)<sup>+</sup> 435.1742 found 435.1739; [ $\alpha$ ]<sub>D</sub><sup>25</sup> 46.6 ( $c$  = 1.84, CHCl<sub>3</sub>). HPLC: (OD-H, 0.1% isopropanol in hexane, 0.7 mL/min) retention times of 13.1 min (minor) and 17.2 min (major), 99% ee.

## Procedure of making derivatives **9a** and **10a**

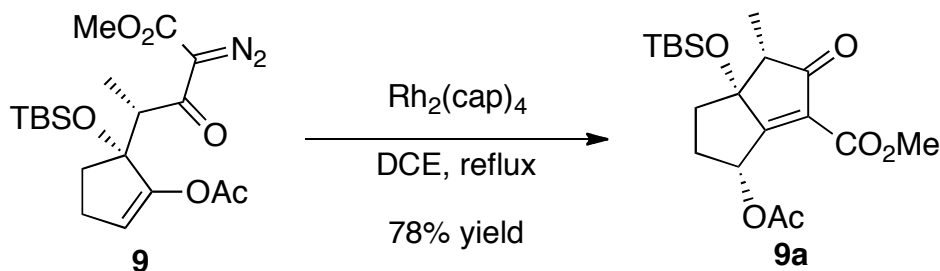

### **(3*S*,3*aR*,6*R*)-methyl 6-acetoxy-3a-((*tert*-butyldimethylsilyl)oxy)-3-methyl-2-oxo-2,3,3*a*,4,5,6-hexahydropentalene-1-carboxylate (**9a**):**

To an oven-dried 10 mL flask containing Rh<sub>2</sub>(cap)<sub>4</sub> (1.3 mg, 0.02 equiv) and Diazoacetate **9** (41.1 mg, 0.1 mmol, 1.0 equiv) in 5 mL anhydrous Dichloroethane was heated to reflux for 1h under argon atmosphere. The mixture was concentrated under reduced pressure and the residue was purified by flash chromatography (1/1 pentane/Et<sub>2</sub>O, R<sub>f</sub>: 0.31) on silica gel to provide **9a** as a colorless powder (29.7 mg, 78% yield).

<sup>1</sup>H NMR (400 MHz, CDCl<sub>3</sub>): δ 6.13 (t, *J* = 7.6 Hz, 1H), 3.81 (s, 3H), 2.51 (dt, *J* = 13.3, 7.6 Hz, 1H), 2.34 (q, *J* = 7.2 Hz, 2H), 2.20-2.27 (m, 1H), 2.11 (s, 3H), 1.55-1.61 (m, 1H), 1.21 (d, *J* = 6.6 Hz, 3H), 0.86 (s, 9H), 0.10 (s, 3H), 0.02 (s, 3H); <sup>13</sup>C NMR (100 MHz, CDCl<sub>3</sub>): δ 204.1, 181.8, 169.8, 161.9, 130.6, 85.6, 68.9, 55.7, 52.2, 36.3, 32.7, 25.9, 20.8, 18.6, 8.6, -2.0, -2.3; IR (neat): 2954, 1746, 1736, 1235, 1114, 1049, 777 cm<sup>-1</sup>; M.p. 117-120 °C; HRMS (APCI) calc. for C<sub>19</sub>H<sub>31</sub>O<sub>6</sub>Si (M+H)<sup>+</sup> 383.1884 found 383.1883; [α]<sub>D</sub><sup>25</sup> 48.2 (*c* = 0.70, CHCl<sub>3</sub>).

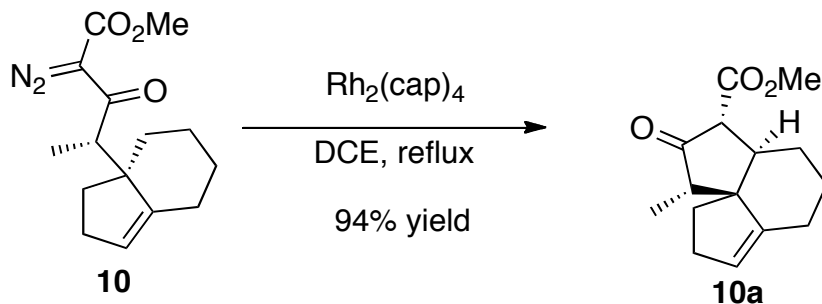

**(1*R*,3*S*,3*aR*,9*aR*)-methyl 3-methyl-2-oxo-2,3,4,5,7,8,9,9*a*-octahydro-1*H*-cyclopenta[*d*]indene-1-carboxylate (**10a**):**

To an oven-dried 10 mL flask containing Rh<sub>2</sub>(cap)<sub>4</sub> (1.3 mg, 0.02 equiv) and Diazoacetate **10** (27.7 mg, 0.1 mmol, 1.0 equiv) in 5 mL anhydrous Dichloroethane was heated to reflux for 1h under argon atmosphere. The mixture was concentrated under reduced pressure and the residue was purified by flash chromatography (7/3 pentane/Et<sub>2</sub>O, R<sub>f</sub>: 0.35) on silica gel to provide **10a** as a colorless powder (23.4 mg, 94% yield).

<sup>1</sup>H NMR (400 MHz, C<sub>6</sub>D<sub>6</sub>): δ 5.28-5.30 (m, 1H), 3.37 (s, 3H), 2.83 (s, 1H), 2.28 (ddd, *J* = 12.5, 5.6, 1.8 Hz, 1H), 2.19 (q, *J* = 7.0 Hz, 1H), 2.11 (dm, *J* = 13.4 Hz, 1H), 1.87-2.04 (m, 4H), 1.56 (t, *J* = 13.6 Hz, 1H), 1.33-1.44 (m, 2H), 1.04-1.12 (m, 1H), 0.95 (d, *J* = 6.7 Hz, 3H), 0.72-0.84 (m, 1H); <sup>13</sup>C NMR (100 MHz, C<sub>6</sub>D<sub>6</sub>): δ 209.9, 169.8, 144.0, 124.8, 60.5, 56.1, 52.2, 49.2, 48.2, 36.4, 31.63, 31.58, 26.8, 25.8, 8.0; IR (neat): 2932, 1753, 1725, 1436, 1256, 1151, 990 cm<sup>-1</sup>; M.p. 74-76 °C; HRMS (APCI) calc. for C<sub>15</sub>H<sub>21</sub>O<sub>3</sub> (M+H)<sup>+</sup> 249.1485 found 249.1482; [α]<sub>D</sub><sup>25</sup> 170.0 (*c* = 0.98, CHCl<sub>3</sub>).

# Crystal structure of *ent-3b*

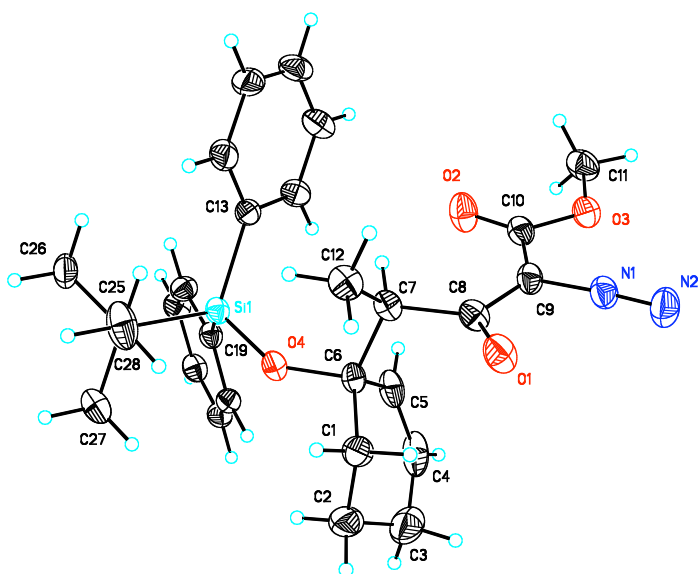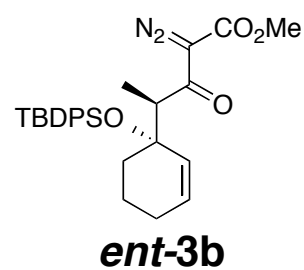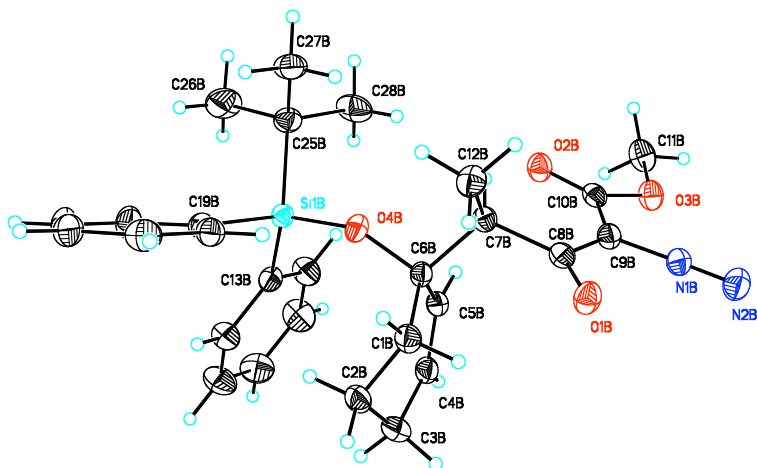



# Crystal structure of 7

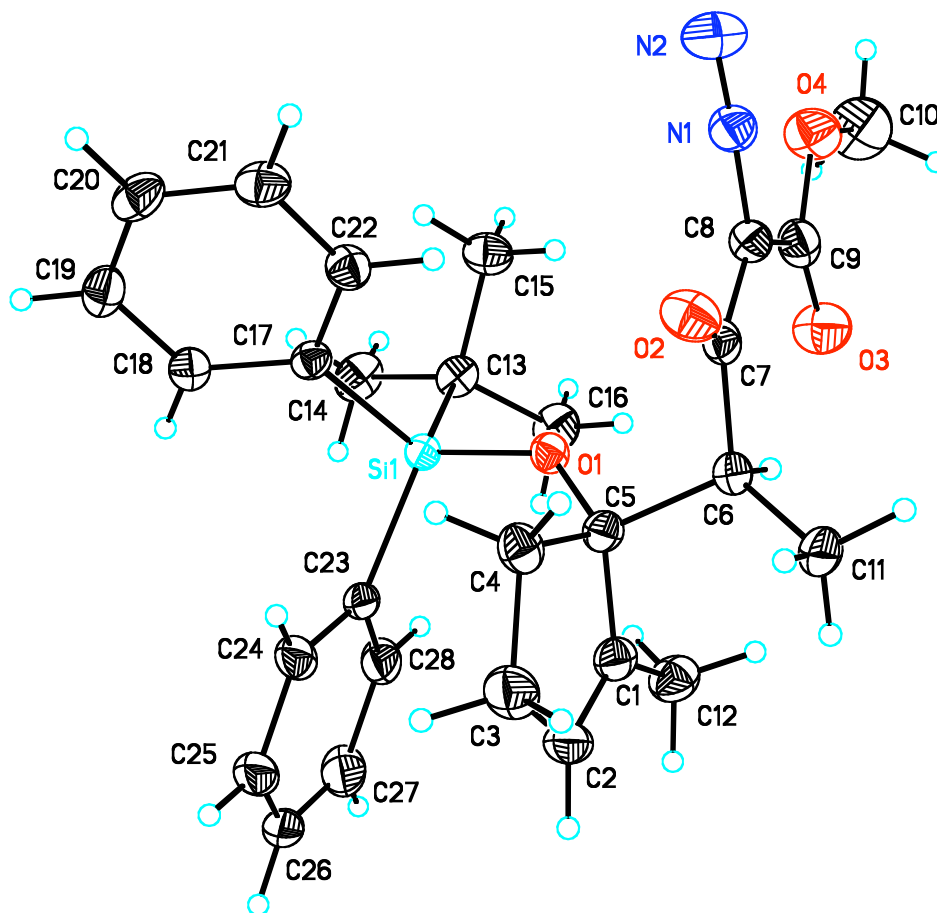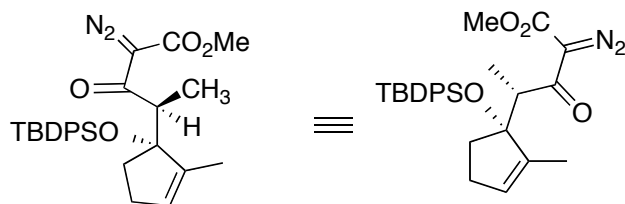

**7**

# Crystal structure of 9a

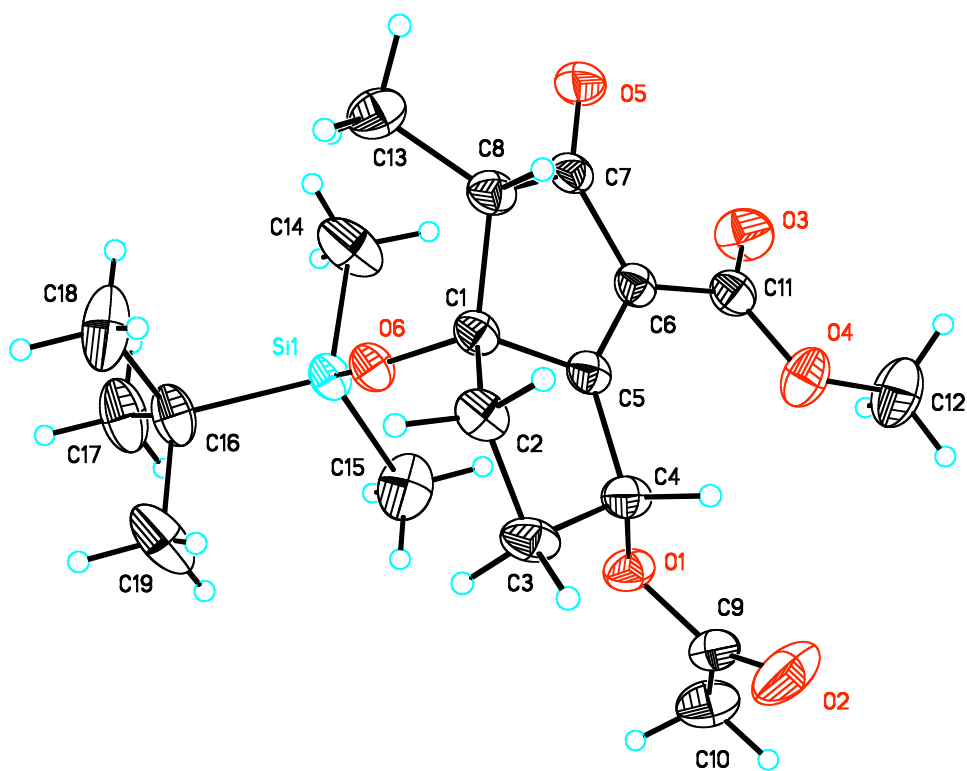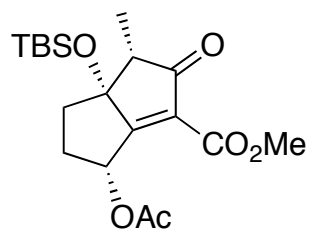

**9a**

# Crystal structure of 10a

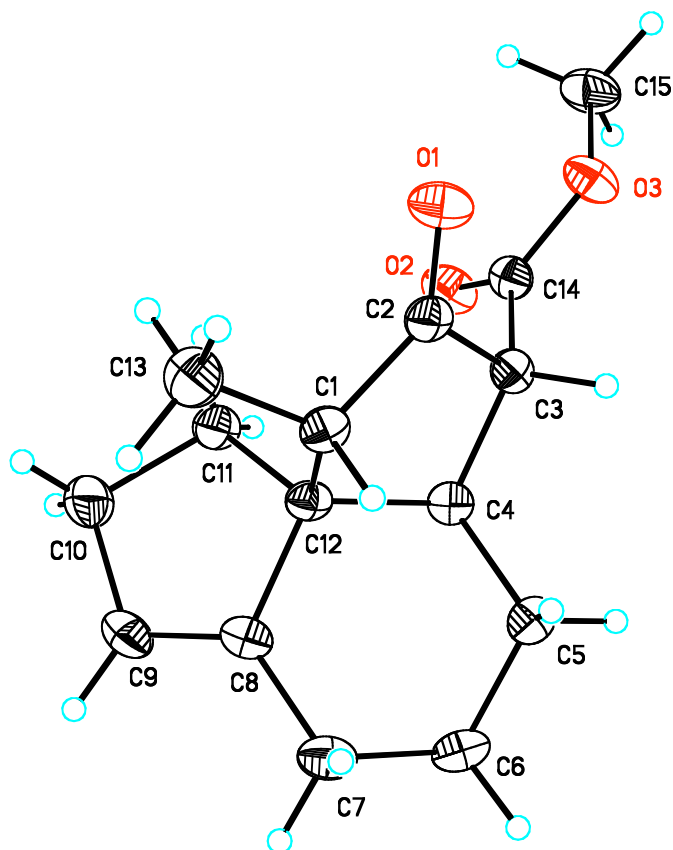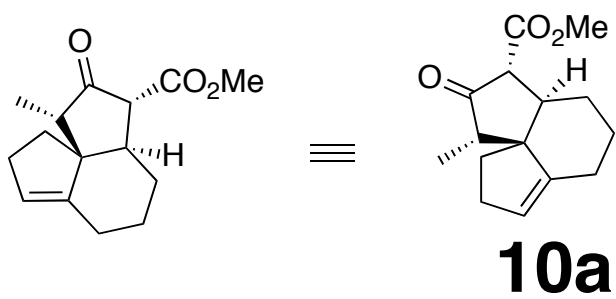

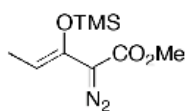

**1**  
400 MHz, C<sub>6</sub>D<sub>6</sub>

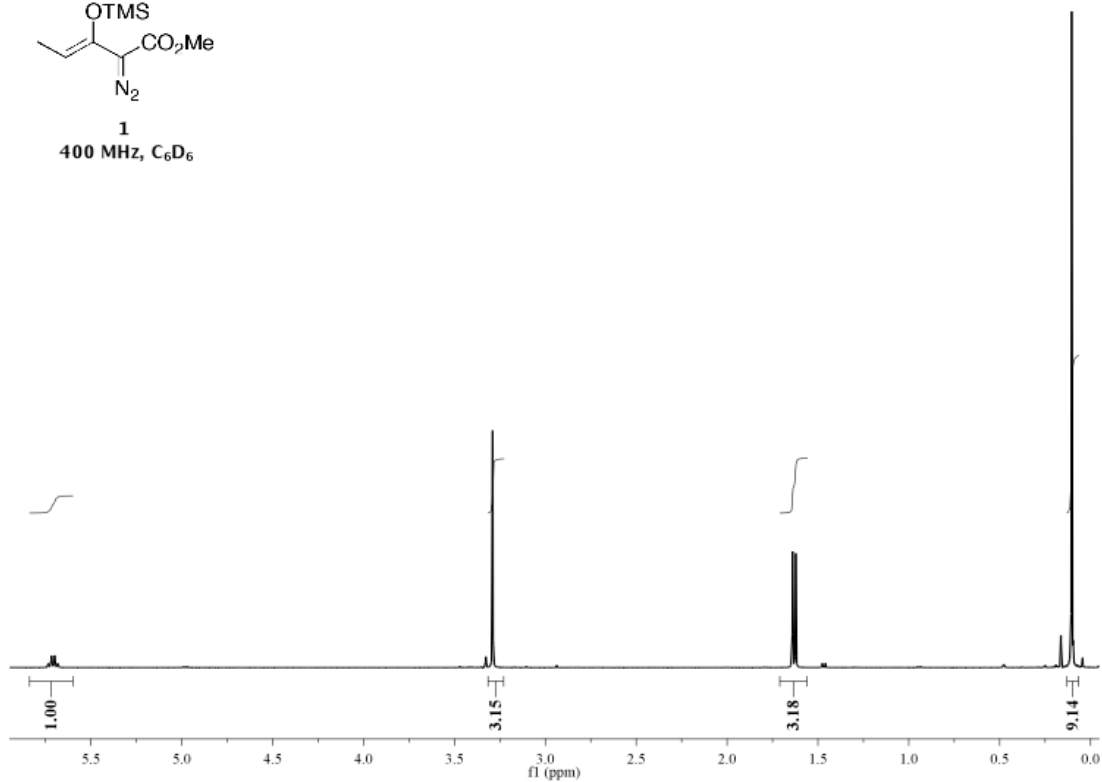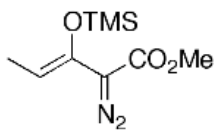

**1**  
150 MHz, C<sub>6</sub>D<sub>6</sub>

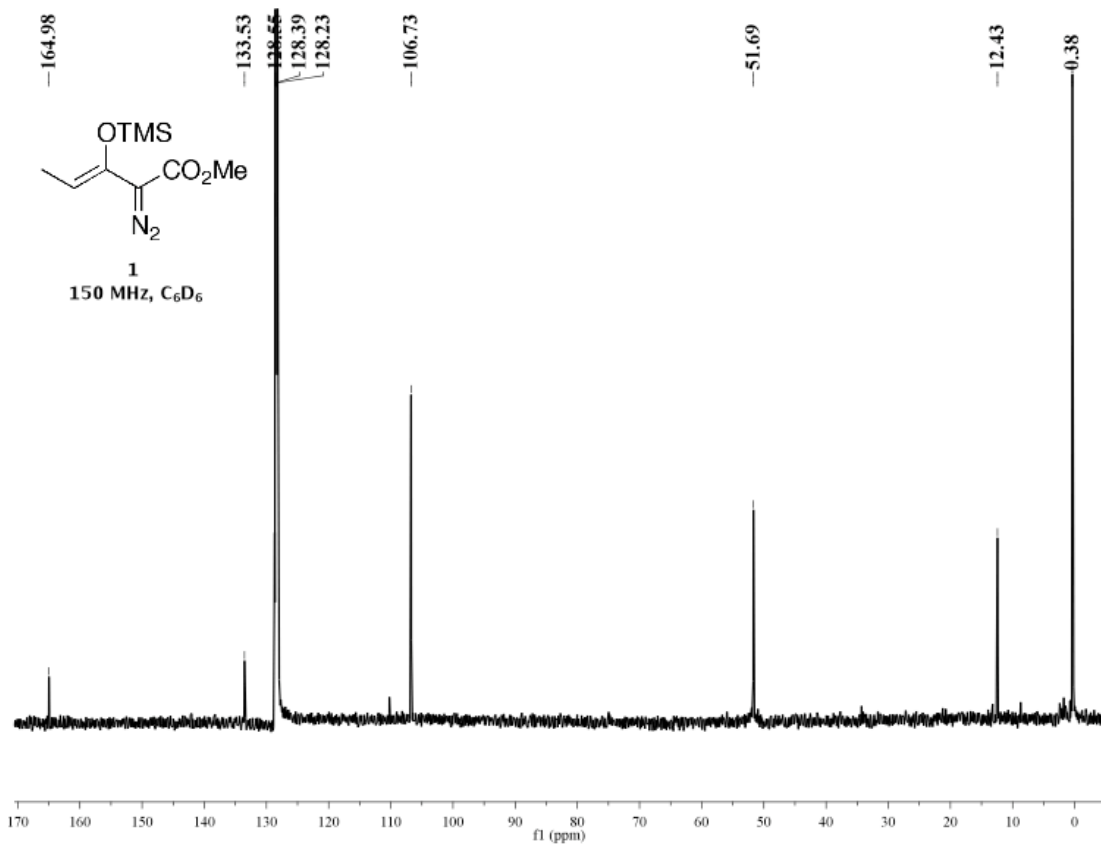

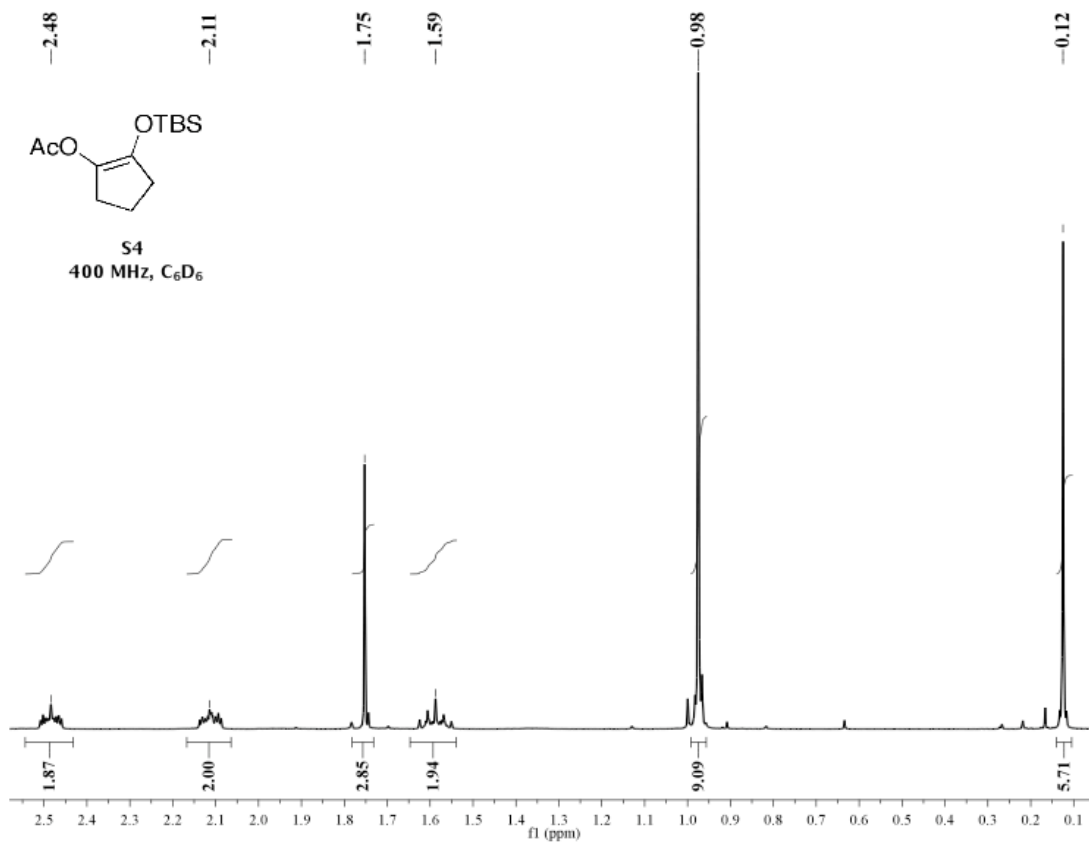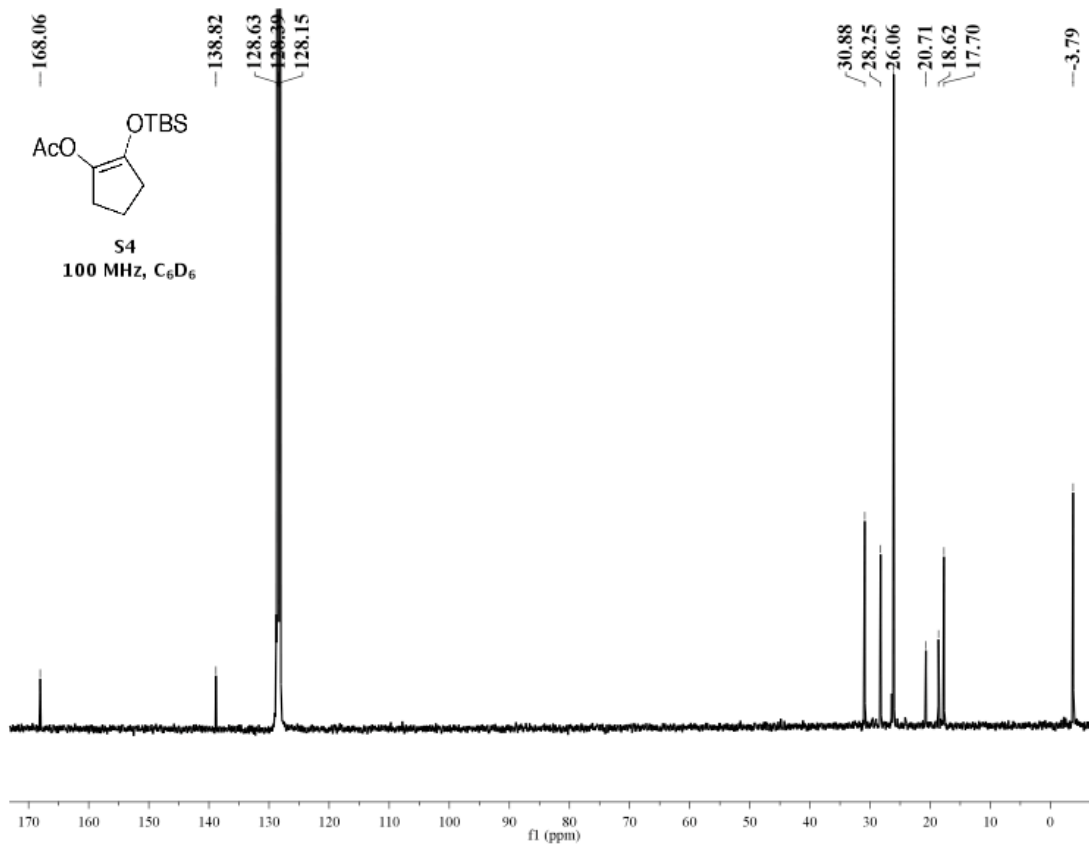

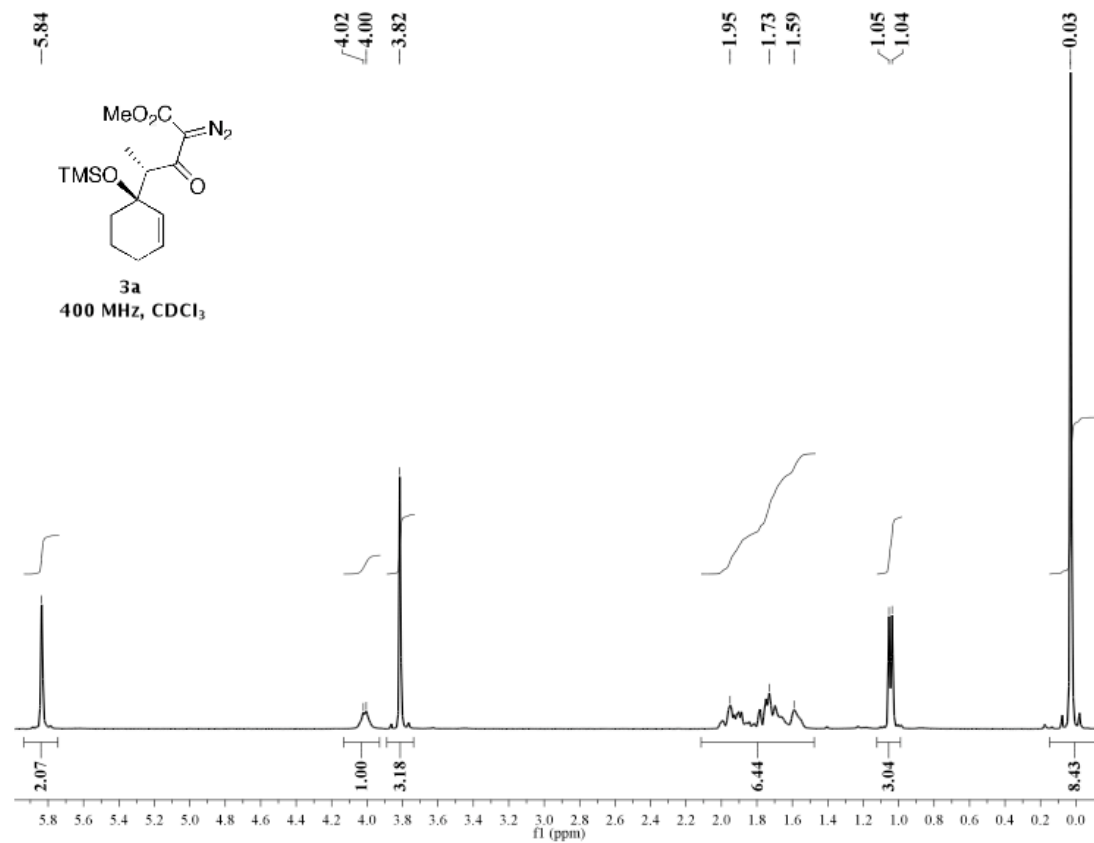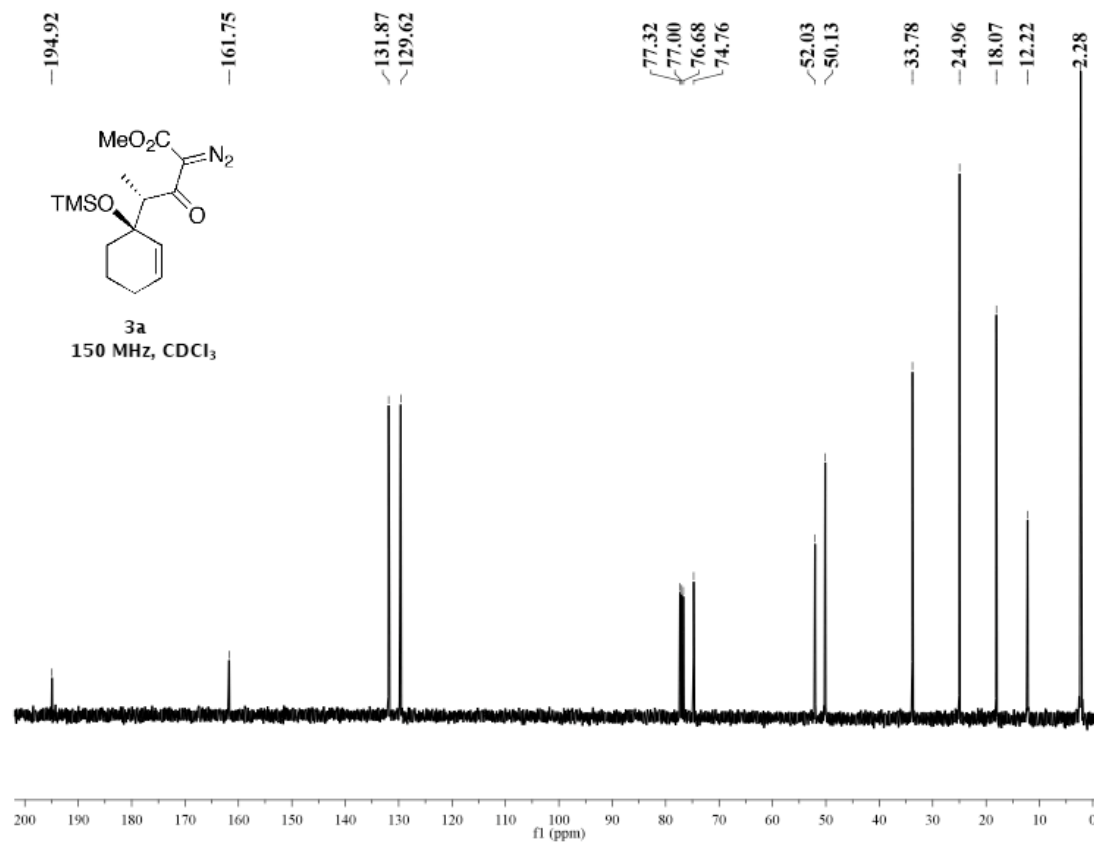

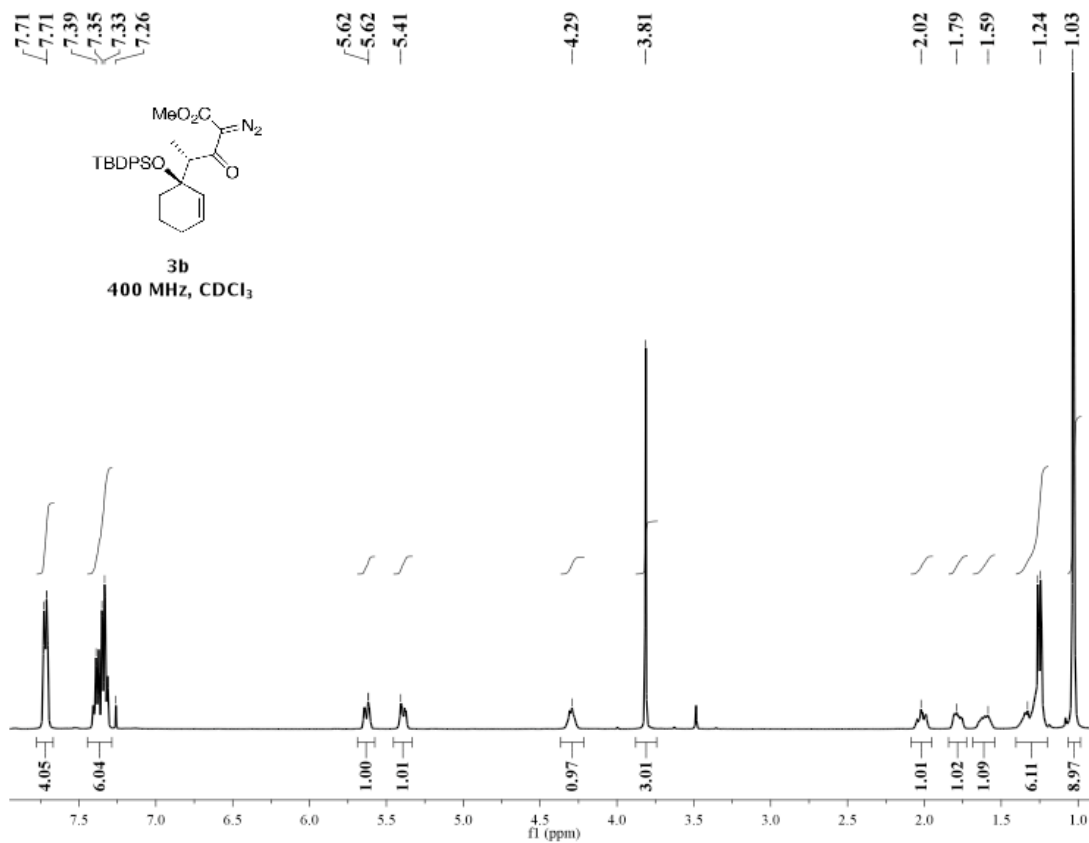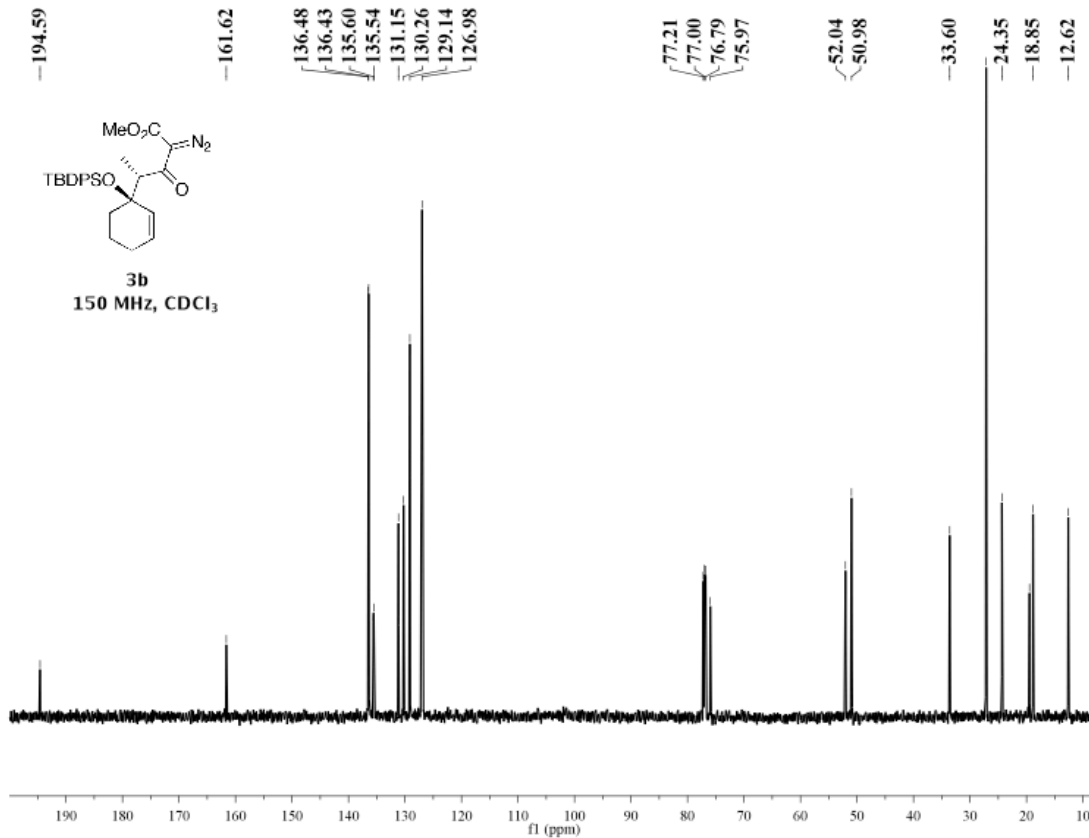

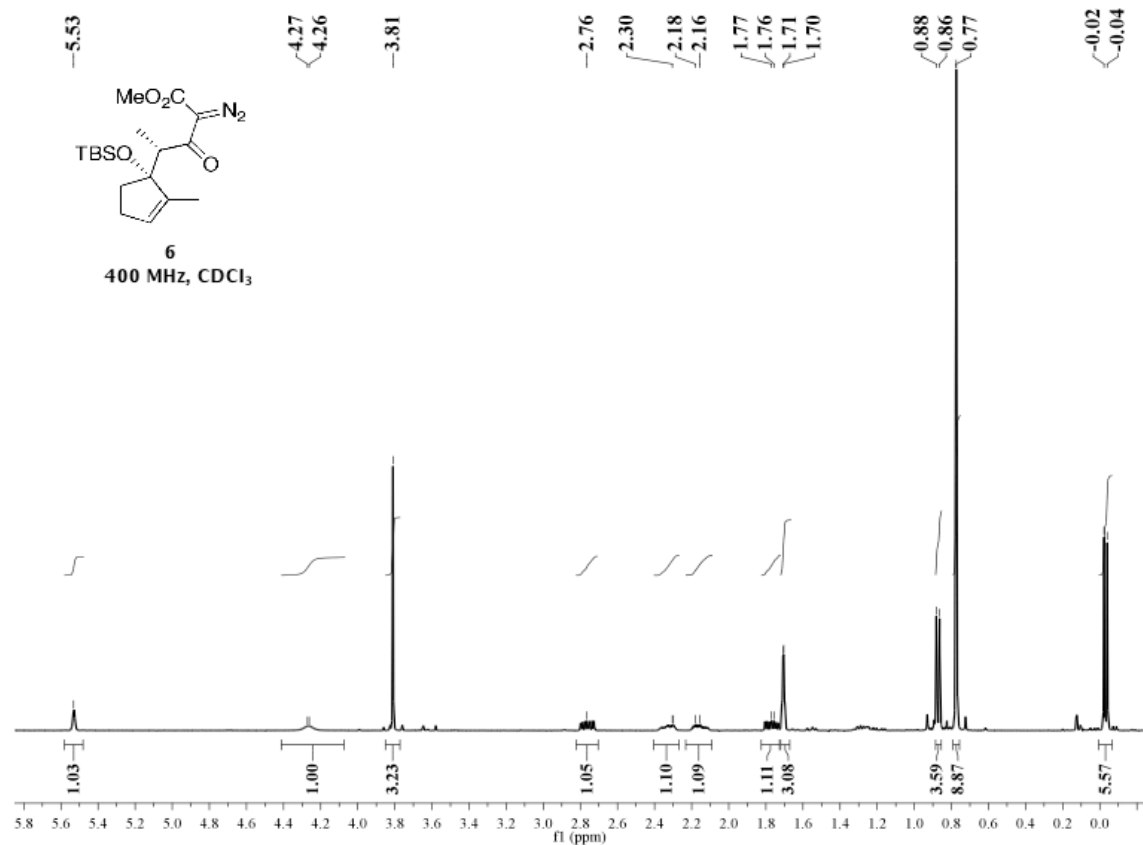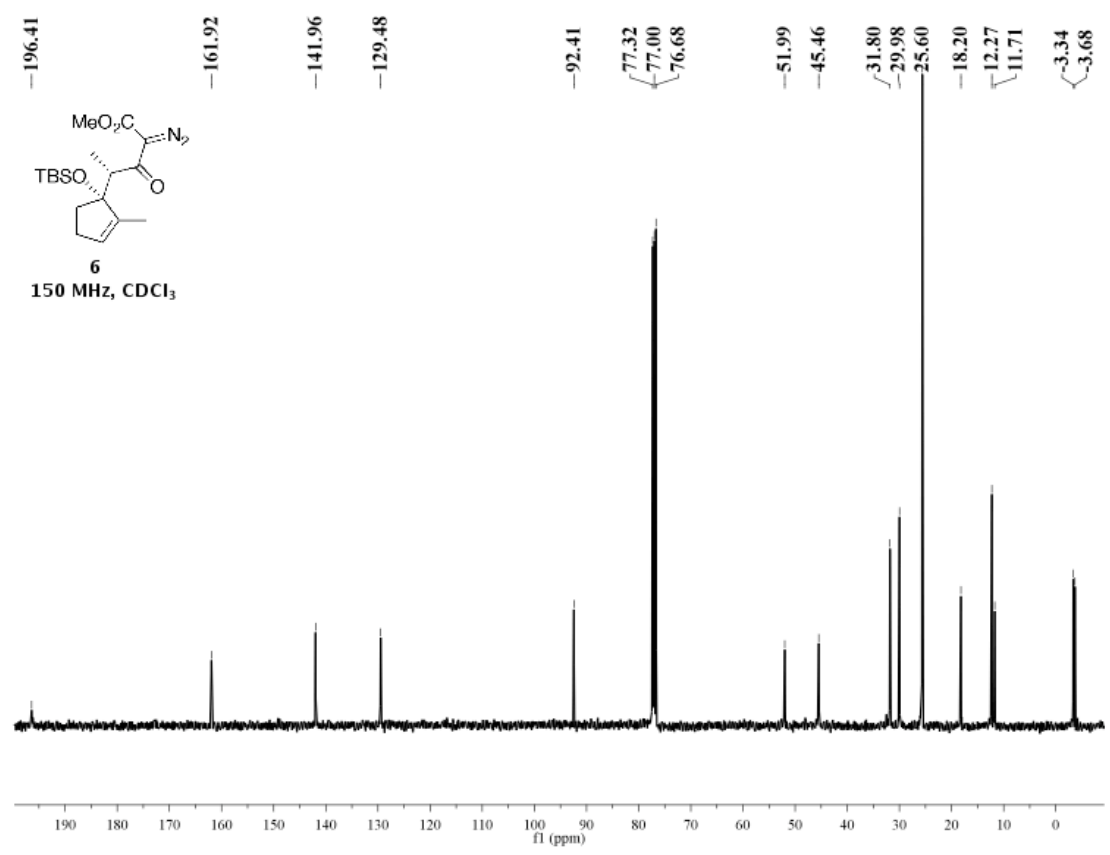





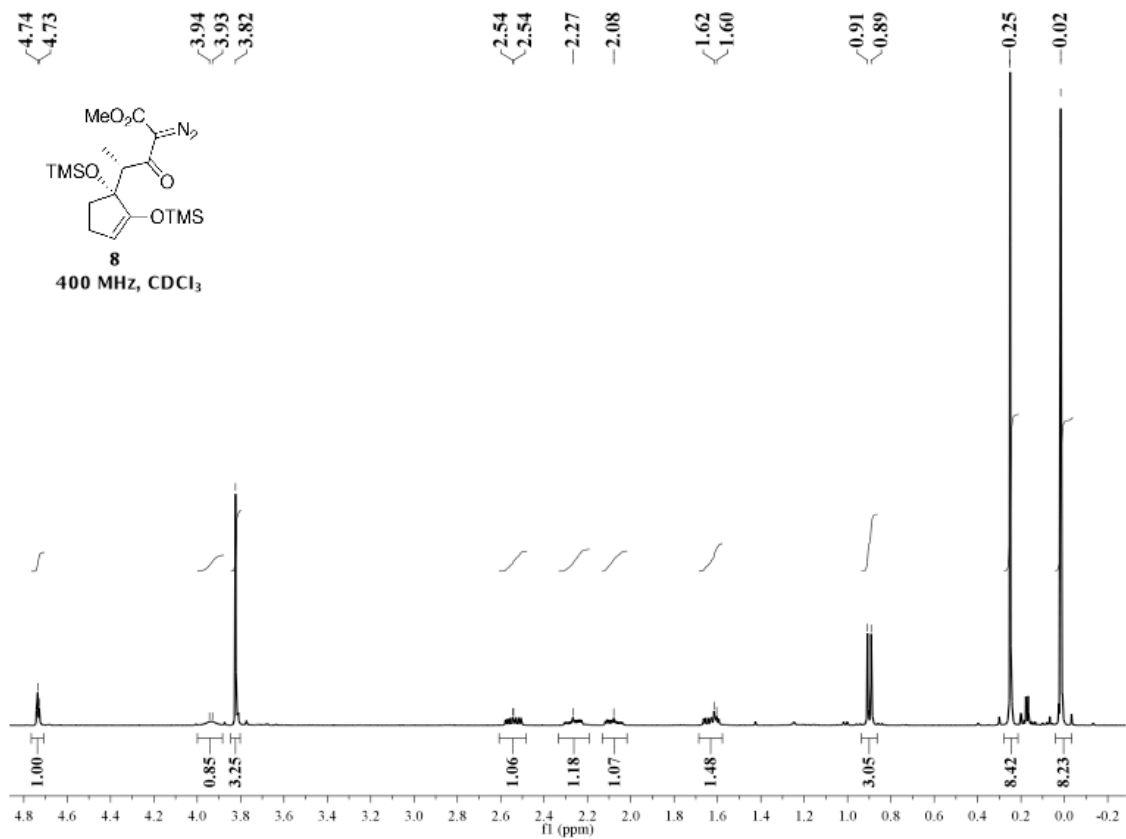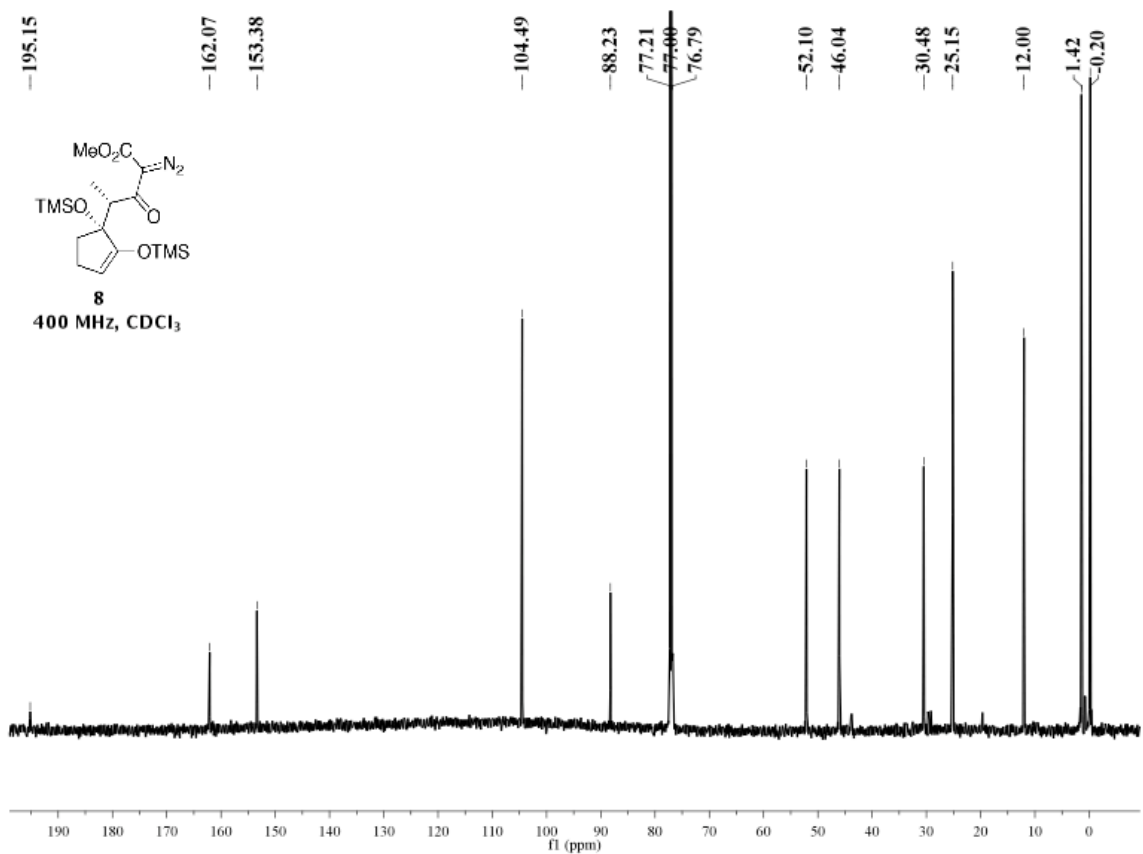

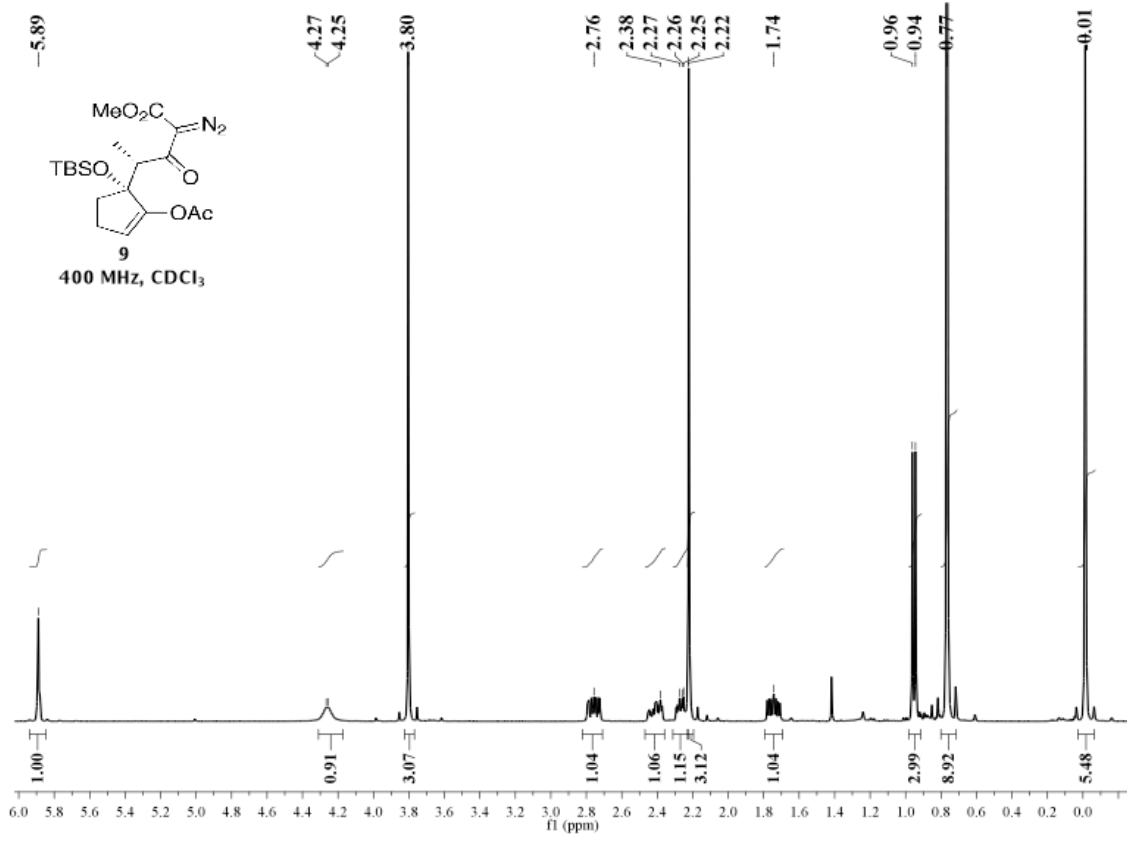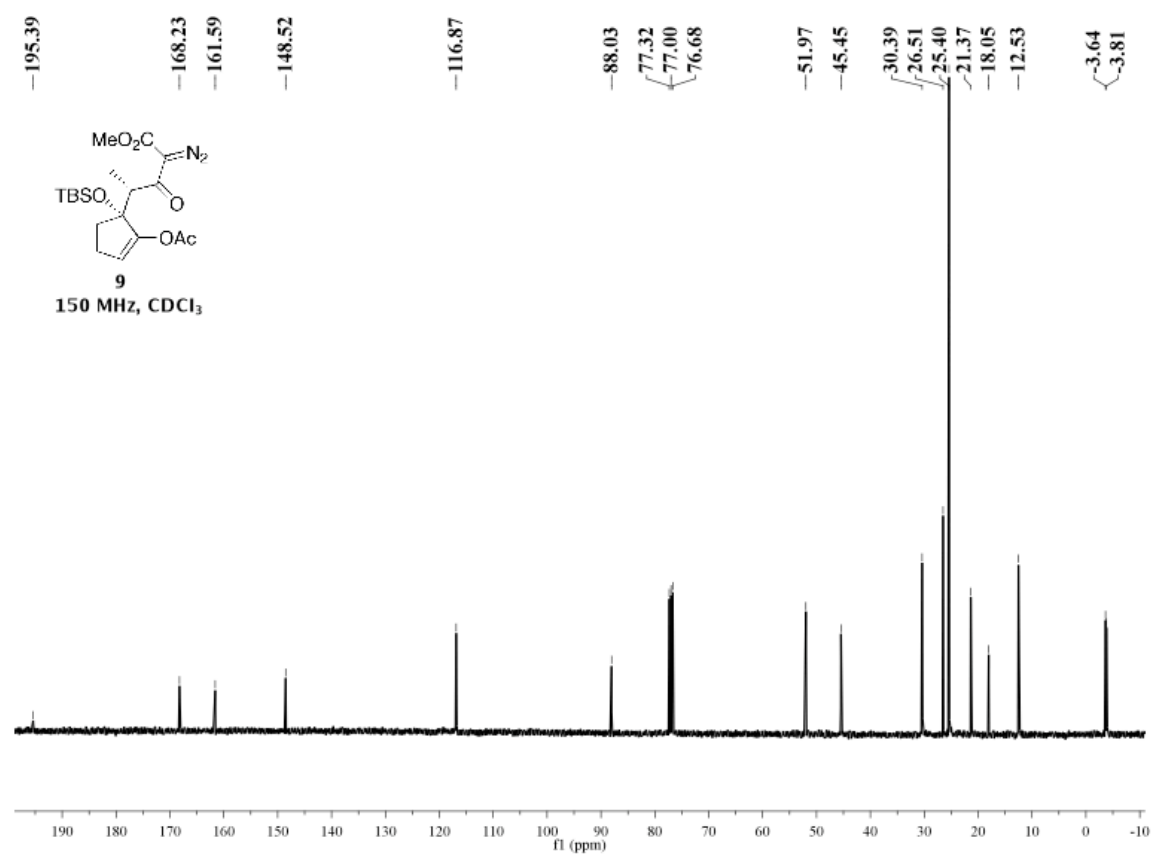

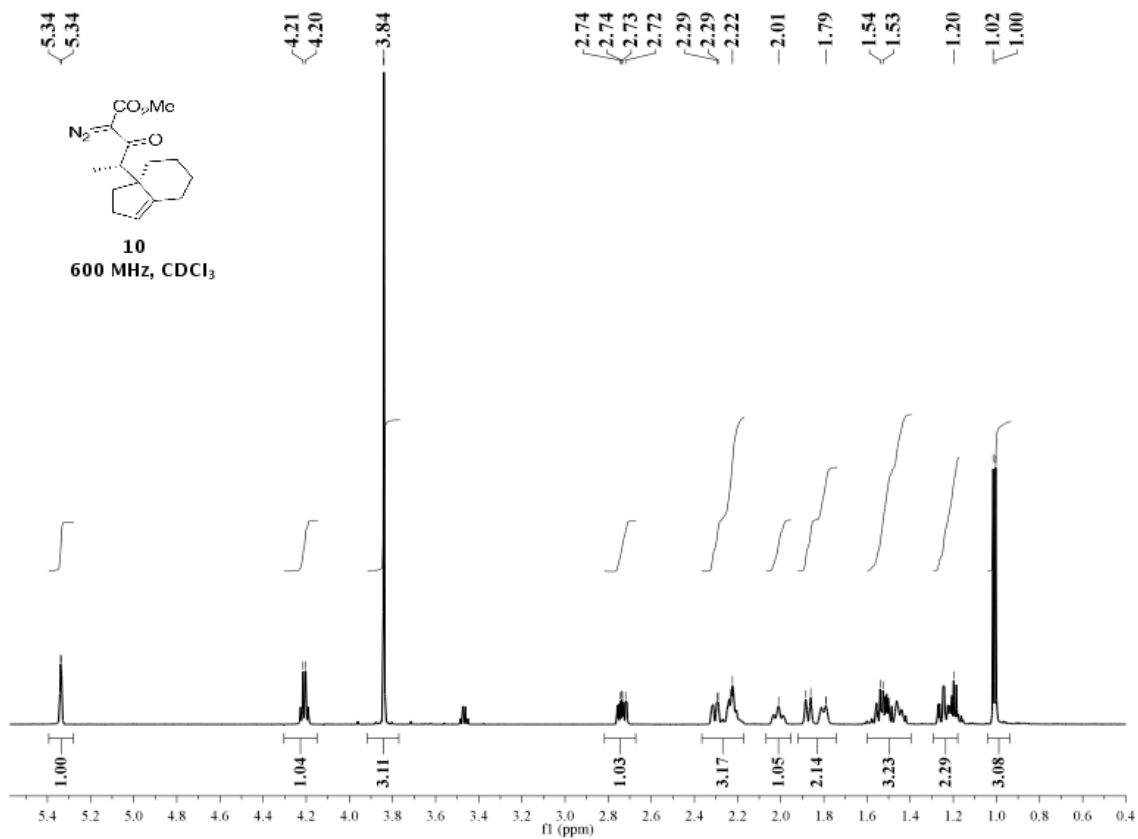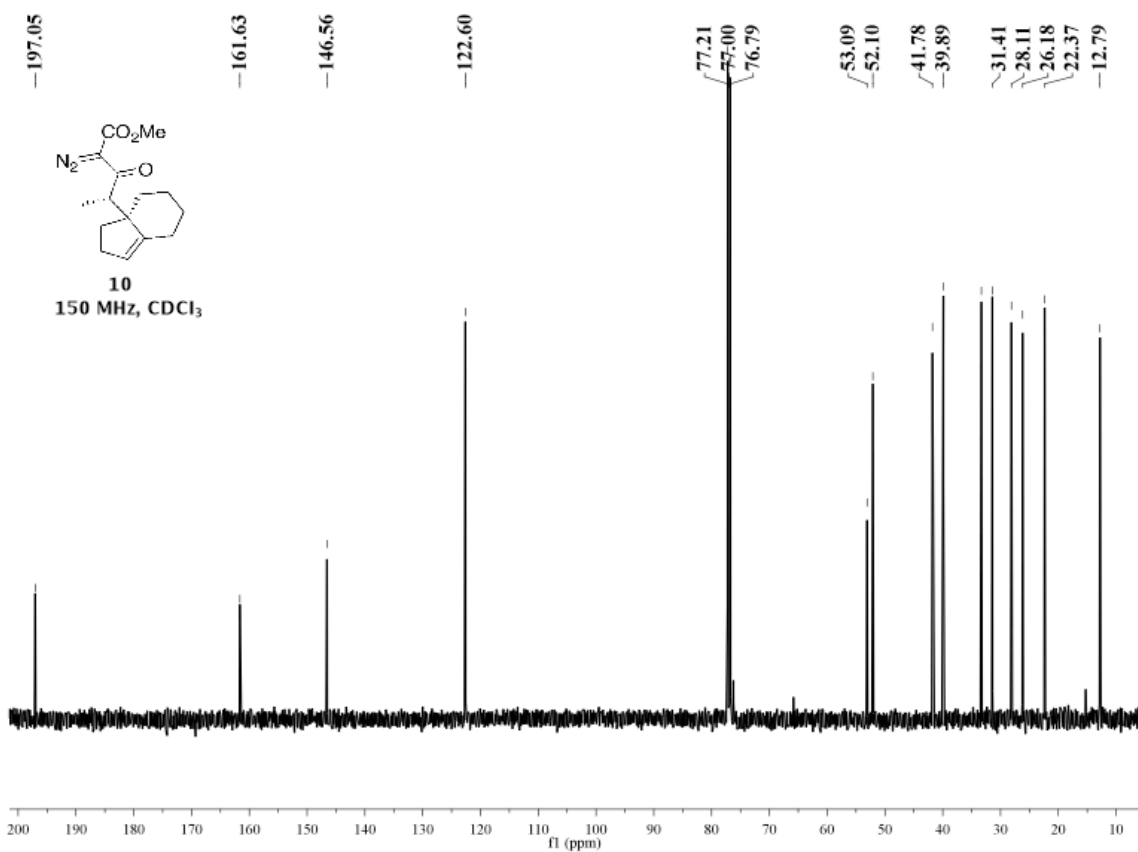

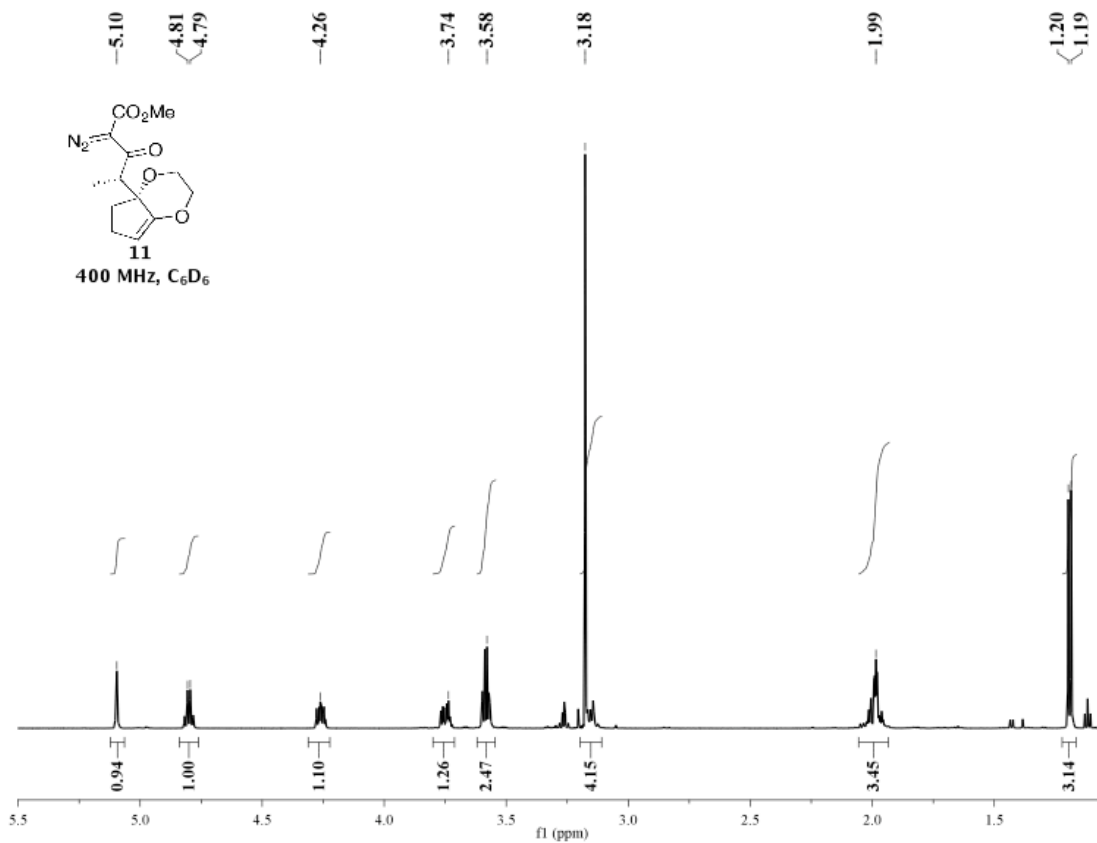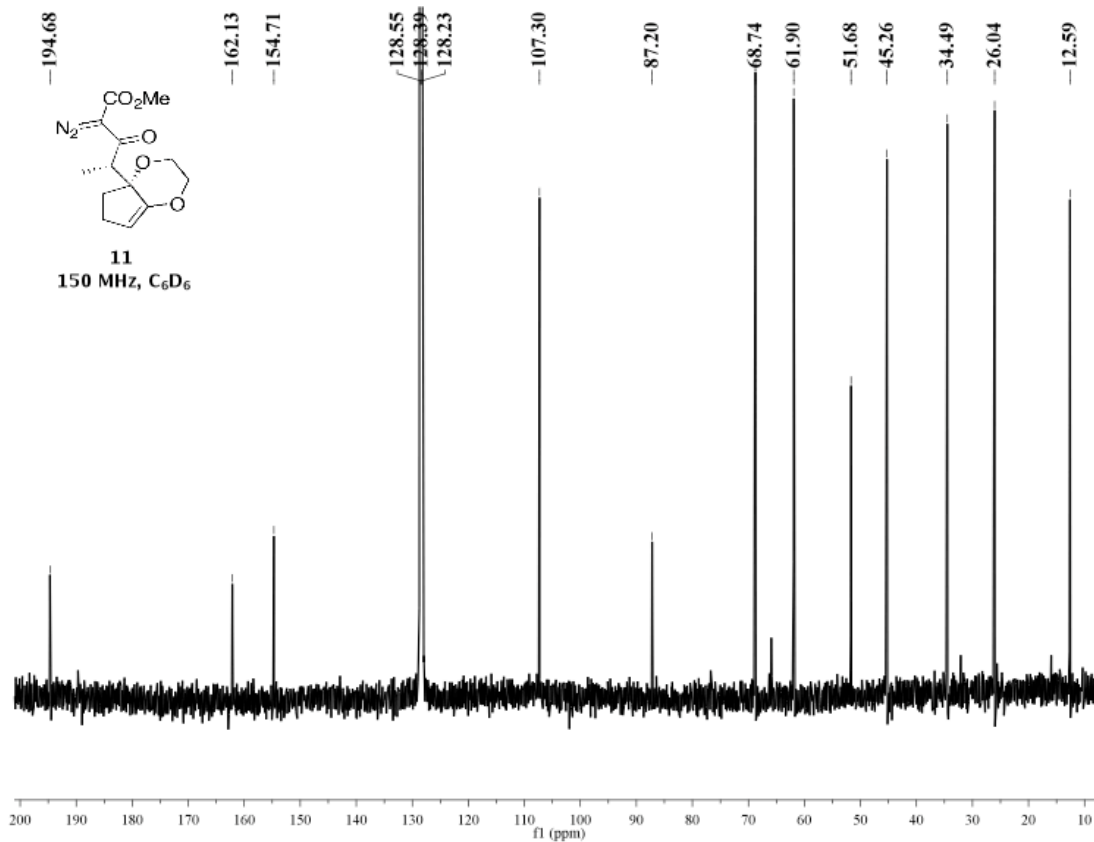

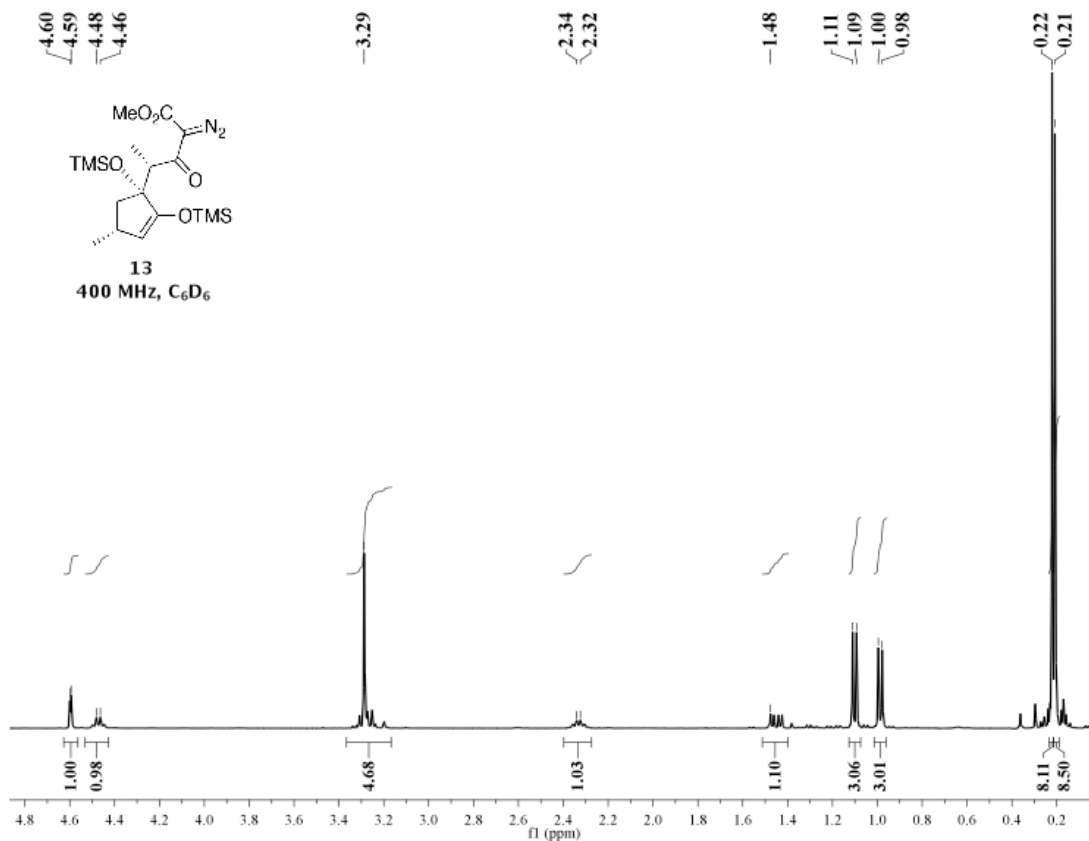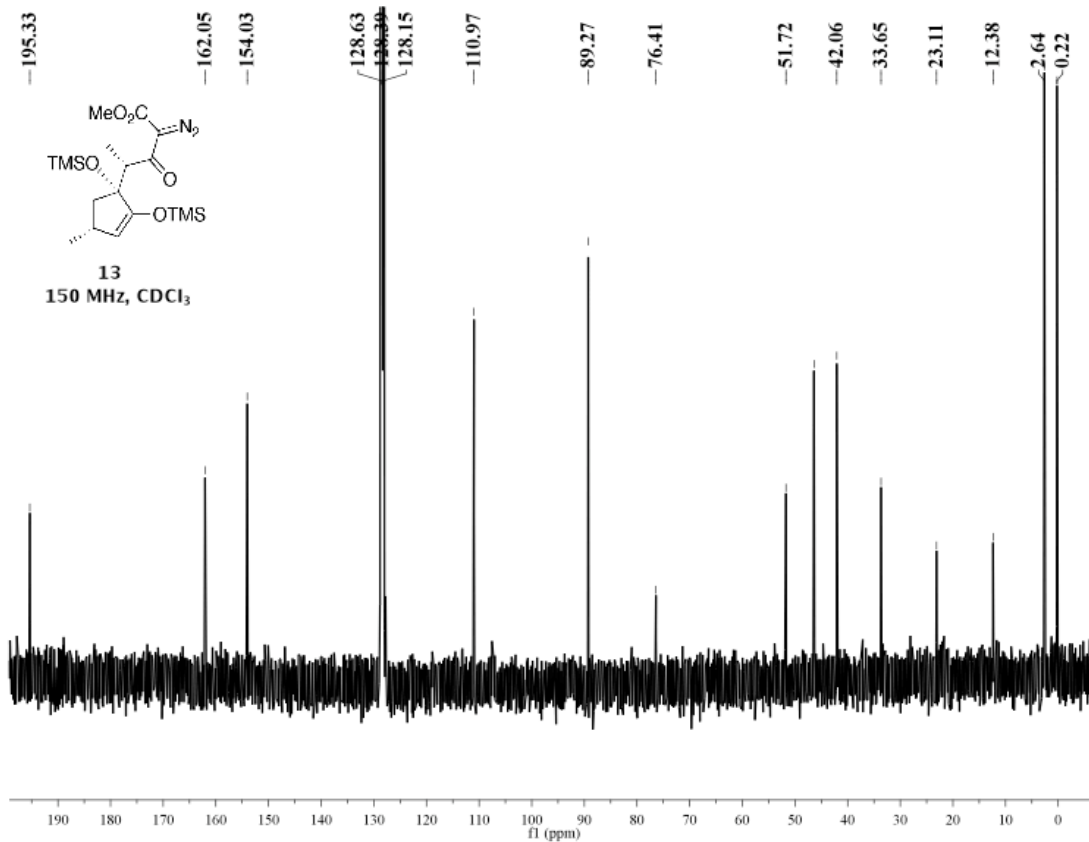

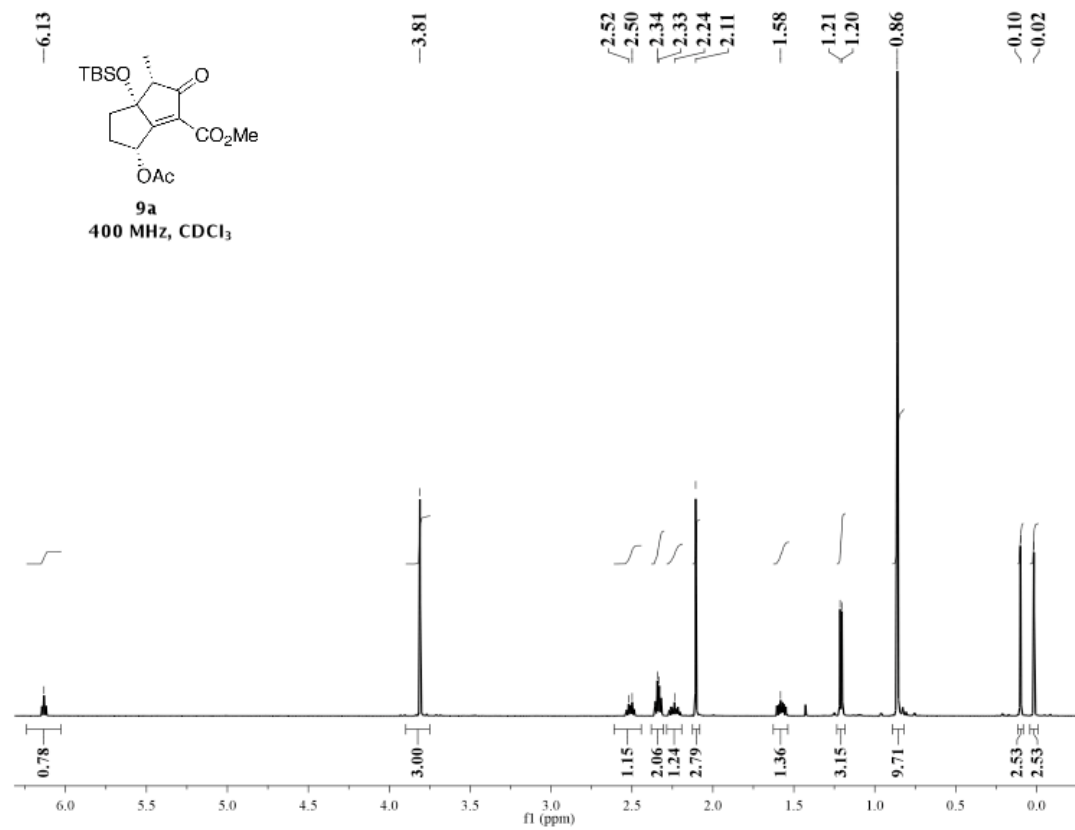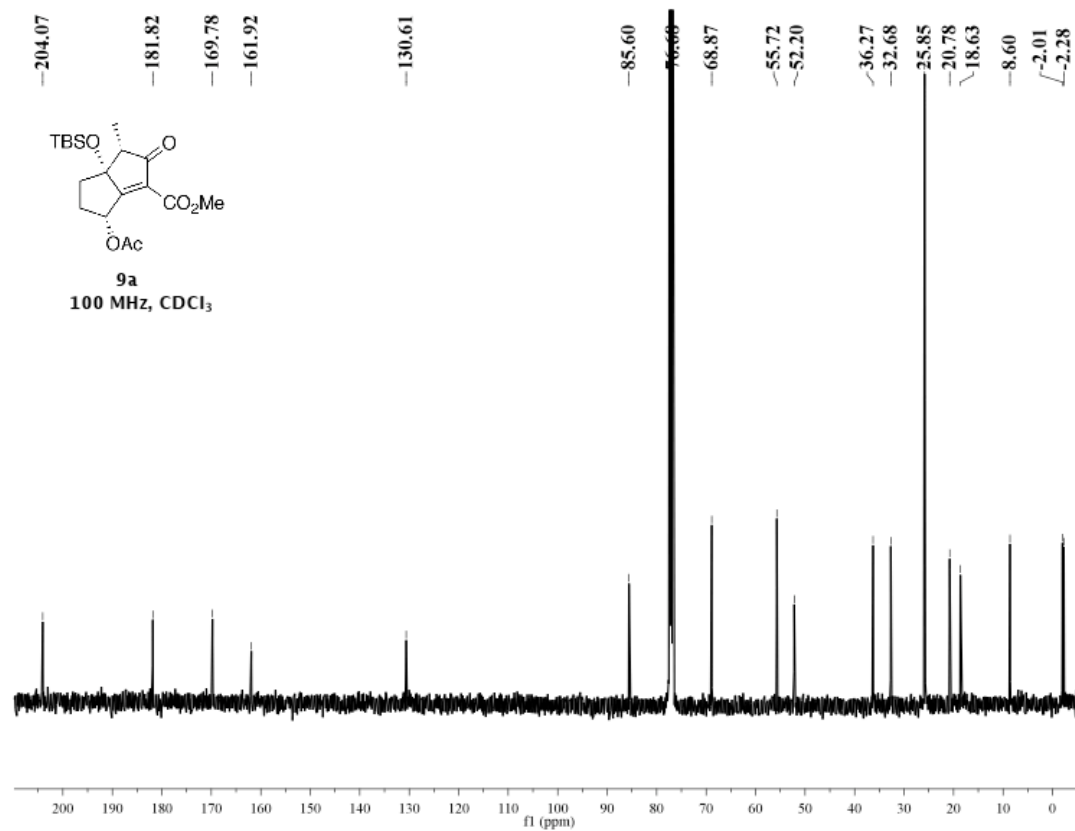

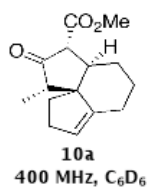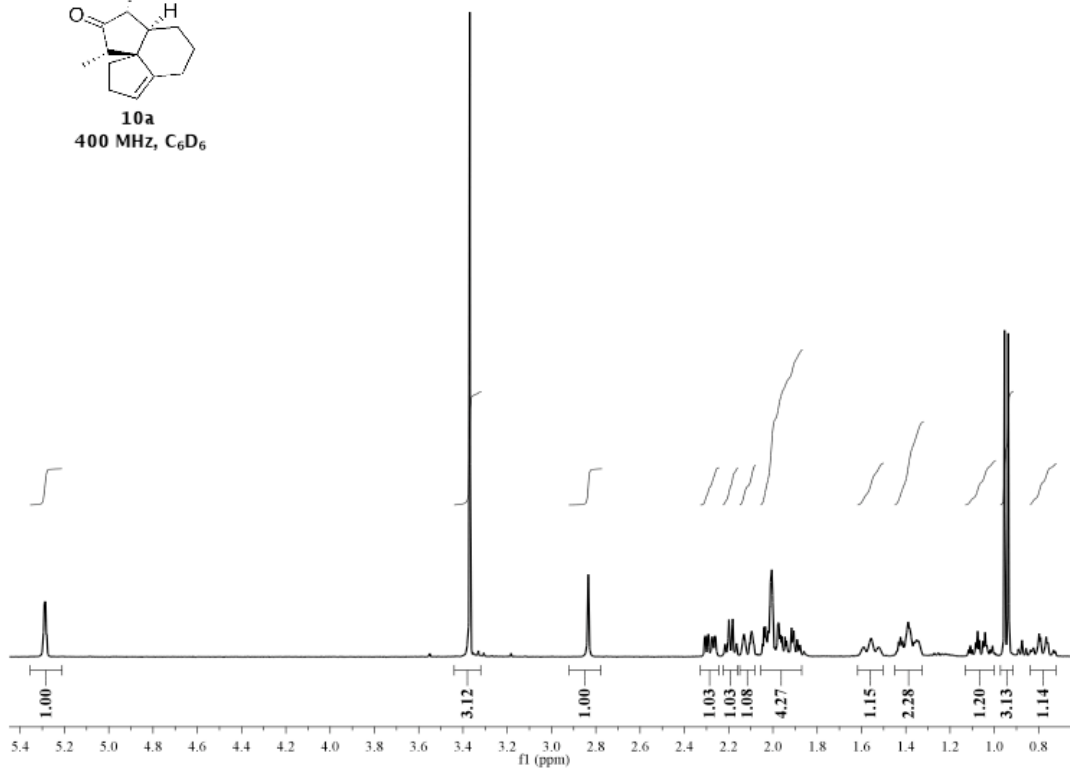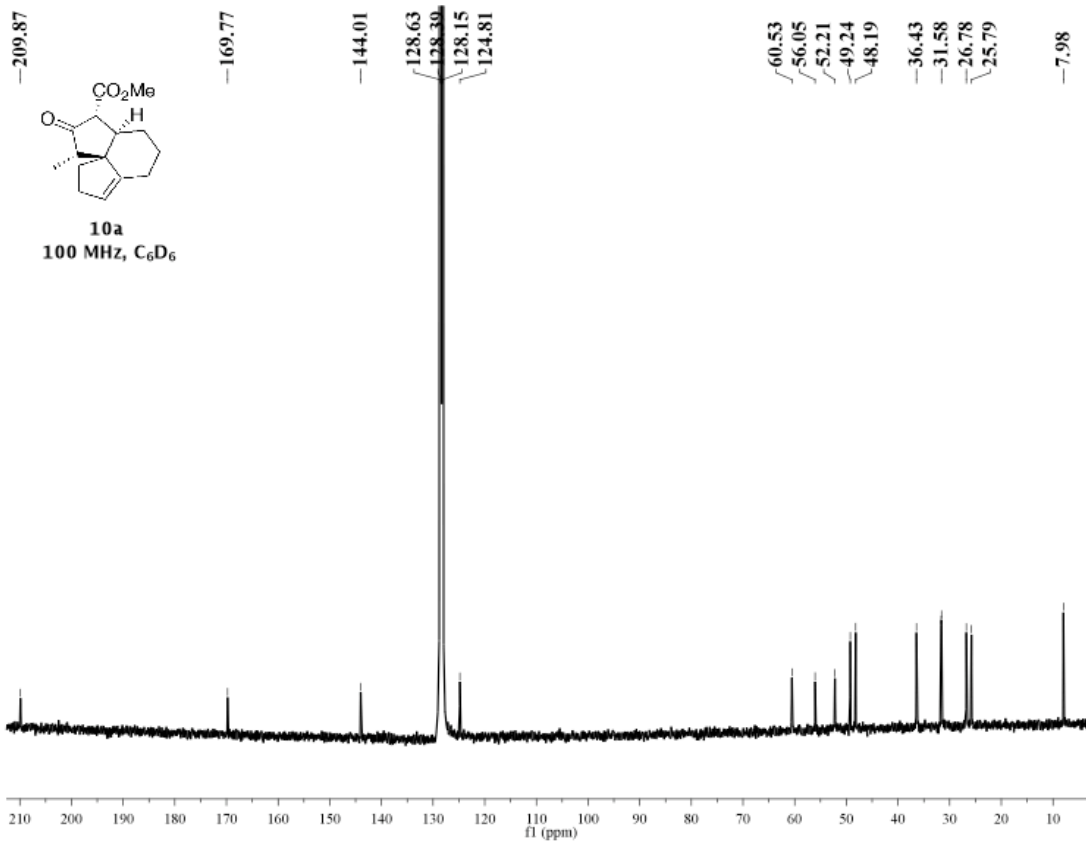

Supplement: NIHMS384580-supplement-1.pdf [file NIHMS384580-supplement-1.pdf]
